# Supplementary material for: CDC42 expression is altered by dioxin exposure and mediated by multilevel regulations via AhR in human neuroblastoma cells
Source: PubMed Central journal article supplement (PMC5578991; doi:10.1038/s41598-017-10311-3), 2017-08-31
Supplement: 41598_2017_10311_MOESM1_ESM.pdf [file 41598_2017_10311_MOESM1_ESM.pdf]

## Supplementary information

### **CDC42 expression is altered by dioxin exposure and mediated by multilevel regulations via**

#### **AhR in human neuroblastoma cells**

Tuan Xu<sup>1, 2, +</sup>, Heidi Q. Xie<sup>1, 2, +</sup>, Yunping Li<sup>1, 2</sup>, Yingjie Xia<sup>1, 2</sup>, Yangsheng Chen<sup>1, 2</sup>, Li Xu<sup>1, 2</sup>,  
Lingyun Wang<sup>1, 2</sup>, Bin Zhao<sup>1, 2, \*</sup>

<sup>1</sup> State Key Laboratory of Environmental Chemistry and Ecotoxicology, Research Center for Eco-Environmental Sciences, Chinese Academy of Sciences, Beijing, 100085, China.

<sup>2</sup> University of Chinese Academy of Sciences, Beijing, 100085, China.

<sup>+</sup> These authors contributed equally to this work.

\*Corresponding author email: binzhao@rcees.ac.cn

Supplementary table 1: A list of differentially expressed miRs from the microarray analysis

| miRBase:<br>Accession | miR               | Fold-<br>Change | p-value  | Description     |
|-----------------------|-------------------|-----------------|----------|-----------------|
| MIMAT0028115          | hsa-miR-7109-5p   | 3.60            | 1.51E-02 | TCDD up vs DMSO |
| MIMAT0004591          | hsa-miR-124-5p    | 3.10            | 2.20E-03 | TCDD up vs DMSO |
| MIMAT0003340          | hsa-miR-542-5p    | 2.34            | 1.02E-02 | TCDD up vs DMSO |
| MIMAT0019743          | hsa-miR-4667-5p   | 2.07            | 6.47E-03 | TCDD up vs DMSO |
| MIMAT0027460          | hsa-miR-6780a-5p  | 1.91            | 3.49E-02 | TCDD up vs DMSO |
| MIMAT0017984          | hsa-miR-3607-5p   | 1.90            | 4.64E-02 | TCDD up vs DMSO |
| MIMAT0002809          | hsa-miR-146b-5p   | 1.90            | 1.00E-02 | TCDD up vs DMSO |
| MIMAT0020925          | hsa-miR-550a-3-5p | 1.87            | 2.72E-02 | TCDD up vs DMSO |
| MIMAT0022695          | hsa-miR-212-5p    | 1.77            | 4.55E-02 | TCDD up vs DMSO |
| MIMAT0005896          | hsa-miR-1244      | 1.73            | 2.27E-02 | TCDD up vs DMSO |
| MIMAT0027481          | hsa-miR-6790-3p   | 1.63            | 4.48E-02 | TCDD up vs DMSO |
| MIMAT0015019          | hsa-miR-3147      | 1.59            | 1.75E-02 | TCDD up vs DMSO |
| MIMAT0007882          | hsa-miR-1909-5p   | 1.57            | 3.30E-02 | TCDD up vs DMSO |
| MIMAT0003337          | hsa-miR-659-3p    | 1.54            | 2.31E-02 | TCDD up vs DMSO |
| MIMAT0002177          | hsa-miR-486-5p    | 1.53            | 8.07E-03 | TCDD up vs DMSO |
| MIMAT0004762          | hsa-miR-486-3p    | 1.53            | 8.07E-03 | TCDD up vs DMSO |
| MIMAT0018967          | hsa-miR-4448      | 1.52            | 1.27E-02 | TCDD up vs DMSO |
| MIMAT0000459          | hsa-miR-193a-3p   | 1.51            | 2.66E-02 | TCDD up vs DMSO |
| MIMAT0027383          | hsa-miR-6741-5p   | 1.51            | 3.45E-02 | TCDD up vs DMSO |
| MIMAT0028116          | hsa-miR-7109-3p   | 1.47            | 8.00E-03 | TCDD up vs DMSO |
| MIMAT0019711          | hsa-miR-4649-5p   | 1.47            | 3.80E-02 | TCDD up vs DMSO |
| MIMAT0017352          | hsa-miR-2277-5p   | 1.47            | 8.89E-03 | TCDD up vs DMSO |
| MIMAT0027574          | hsa-miR-6836-5p   | 1.45            | 3.03E-03 | TCDD up vs DMSO |
| MIMAT0030017          | hsa-miR-7702      | 1.45            | 1.65E-02 | TCDD up vs DMSO |
| MIMAT0018005          | hsa-miR-3622b-5p  | 1.44            | 9.84E-04 | TCDD up vs DMSO |
| MIMAT0018006          | hsa-miR-3622b-3p  | 1.44            | 9.84E-04 | TCDD up vs DMSO |
| MIMAT0026618          | hsa-miR-585-5p    | 1.43            | 3.71E-02 | TCDD up vs DMSO |
| MIMAT0000261          | hsa-miR-183-5p    | 1.42            | 2.84E-03 | TCDD up vs DMSO |
| MIMAT0016849          | hsa-miR-4294      | 1.42            | 4.83E-02 | TCDD up vs DMSO |
| MIMAT0003276          | hsa-miR-608       | 1.41            | 2.41E-02 | TCDD up vs DMSO |
| MIMAT0014990          | hsa-miR-3127-5p   | 1.41            | 1.33E-02 | TCDD up vs DMSO |
| MIMAT0019201          | hsa-miR-3127-3p   | 1.41            | 1.33E-02 | TCDD up vs DMSO |
| MIMAT0016889          | hsa-miR-4327      | 1.40            | 3.05E-02 | TCDD up vs DMSO |
| MIMAT0017988          | hsa-miR-3611      | 1.39            | 4.44E-02 | TCDD up vs DMSO |
| MIMAT0019755          | hsa-miR-4673      | 1.38            | 4.66E-02 | TCDD up vs DMSO |
| MIMAT0016868          | hsa-miR-4314      | 1.38            | 6.61E-03 | TCDD up vs DMSO |
| MIMAT0022696          | hsa-miR-301a-5p   | 1.37            | 1.76E-02 | TCDD up vs DMSO |
| MIMAT0000688          | hsa-miR-301a-3p   | 1.37            | 1.76E-02 | TCDD up vs DMSO |
| MIMAT0002806          | hsa-miR-490-3p    | 1.37            | 8.77E-03 | TCDD up vs DMSO |
| MIMAT0004804          | hsa-miR-615-5p    | 1.36            | 4.71E-02 | TCDD up vs DMSO |

|              |                  |      |          |                 |
|--------------|------------------|------|----------|-----------------|
| MIMAT0027547 | hsa-miR-6823-3p  | 1.36 | 3.52E-02 | TCDD up vs DMSO |
| MIMAT0019829 | hsa-miR-4717-5p  | 1.35 | 3.75E-02 | TCDD up vs DMSO |
| MIMAT0019830 | hsa-miR-4717-3p  | 1.35 | 3.75E-02 | TCDD up vs DMSO |
| MIMAT0019066 | hsa-miR-4527     | 1.35 | 6.88E-03 | TCDD up vs DMSO |
| MIMAT0018112 | hsa-miR-3684     | 1.35 | 7.90E-03 | TCDD up vs DMSO |
| MIMAT0027652 | hsa-miR-6876-5p  | 1.34 | 3.00E-03 | TCDD up vs DMSO |
| MIMAT0001339 | hsa-miR-422a     | 1.34 | 1.74E-03 | TCDD up vs DMSO |
| MIMAT0005902 | hsa-miR-1250-5p  | 1.32 | 1.32E-02 | TCDD up vs DMSO |
| MIMAT0015076 | hsa-miR-3192-5p  | 1.32 | 1.07E-02 | TCDD up vs DMSO |
| MIMAT0003279 | hsa-miR-611      | 1.31 | 4.47E-02 | TCDD up vs DMSO |
| MIMAT0027380 | hsa-miR-6739-3p  | 1.31 | 1.12E-02 | TCDD up vs DMSO |
| MIMAT0000684 | hsa-miR-302a-3p  | 1.31 | 1.43E-02 | TCDD up vs DMSO |
| MIMAT0027432 | hsa-miR-6766-5p  | 1.31 | 5.47E-03 | TCDD up vs DMSO |
| MIMAT0007889 | hsa-miR-1914-5p  | 1.30 | 3.93E-02 | TCDD up vs DMSO |
| MIMAT0019903 | hsa-miR-4758-5p  | 1.30 | 1.39E-02 | TCDD up vs DMSO |
| MIMAT0019904 | hsa-miR-4758-3p  | 1.30 | 1.39E-02 | TCDD up vs DMSO |
| MIMAT0028111 | hsa-miR-7107-5p  | 1.28 | 1.09E-03 | TCDD up vs DMSO |
| MIMAT0028112 | hsa-miR-7107-3p  | 1.28 | 1.09E-03 | TCDD up vs DMSO |
| MIMAT0019023 | hsa-miR-4489     | 1.27 | 2.64E-02 | TCDD up vs DMSO |
| MIMAT0019206 | hsa-miR-3150a-5p | 1.27 | 1.39E-02 | TCDD up vs DMSO |
| MIMAT0015023 | hsa-miR-3150a-3p | 1.27 | 1.39E-02 | TCDD up vs DMSO |
| MIMAT0027381 | hsa-miR-6740-5p  | 1.27 | 4.06E-02 | TCDD up vs DMSO |
| MIMAT0004564 | hsa-miR-214-5p   | 1.27 | 7.13E-03 | TCDD up vs DMSO |
| MIMAT0027358 | hsa-miR-6728-3p  | 1.27 | 2.24E-02 | TCDD up vs DMSO |
| MIMAT0016855 | hsa-miR-4302     | 1.27 | 1.80E-02 | TCDD up vs DMSO |
| MIMAT0027444 | hsa-miR-6772-5p  | 1.26 | 3.93E-02 | TCDD up vs DMSO |
| MIMAT0009199 | hsa-miR-365a-5p  | 1.26 | 2.22E-02 | TCDD up vs DMSO |
| MIMAT0000710 | hsa-miR-365a-3p  | 1.26 | 2.22E-02 | TCDD up vs DMSO |
| MIMAT0011162 | hsa-miR-2117     | 1.25 | 3.99E-02 | TCDD up vs DMSO |
| MIMAT0030415 | hsa-miR-1273h-5p | 1.25 | 3.48E-02 | TCDD up vs DMSO |
| MIMAT0030416 | hsa-miR-1273h-3p | 1.25 | 3.48E-02 | TCDD up vs DMSO |
| MIMAT0019014 | hsa-miR-4480     | 1.25 | 2.18E-03 | TCDD up vs DMSO |
| MIMAT0018178 | hsa-miR-3180-4   | 1.24 | 3.32E-02 | TCDD up vs DMSO |
| MIMAT0002880 | hsa-miR-508-3p   | 1.24 | 2.39E-02 | TCDD up vs DMSO |
| MIMAT0019058 | hsa-miR-4521     | 1.24 | 3.81E-02 | TCDD up vs DMSO |
| MIMAT0002852 | hsa-miR-517a-3p  | 1.23 | 2.35E-02 | TCDD up vs DMSO |
| MIMAT0002857 | hsa-miR-517b-3p  | 1.23 | 2.35E-02 | TCDD up vs DMSO |
| MIMAT0004780 | hsa-miR-532-3p   | 1.23 | 7.80E-03 | TCDD up vs DMSO |
| MIMAT0015064 | hsa-miR-3184-5p  | 1.23 | 3.86E-02 | TCDD up vs DMSO |
| MIMAT0022731 | hsa-miR-3184-3p  | 1.23 | 3.86E-02 | TCDD up vs DMSO |
| MIMAT0022476 | hsa-miR-5692c    | 1.23 | 4.08E-02 | TCDD up vs DMSO |
| MIMAT0004901 | hsa-miR-298      | 1.23 | 3.69E-02 | TCDD up vs DMSO |
| MIMAT0026619 | hsa-miR-597-3p   | 1.22 | 2.67E-02 | TCDD up vs DMSO |

|              |                  |      |          |                 |
|--------------|------------------|------|----------|-----------------|
| MIMAT0021085 | hsa-miR-5093     | 1.21 | 1.54E-02 | TCDD up vs DMSO |
| MIMAT0030018 | hsa-miR-7703     | 1.21 | 4.26E-02 | TCDD up vs DMSO |
| MIMAT0019971 | hsa-miR-4796-3p  | 1.21 | 4.01E-02 | TCDD up vs DMSO |
| MIMAT0019722 | hsa-miR-4655-3p  | 1.21 | 2.59E-02 | TCDD up vs DMSO |
| MIMAT0019862 | hsa-miR-4736     | 1.21 | 3.89E-02 | TCDD up vs DMSO |
| MIMAT0016903 | hsa-miR-4273     | 1.20 | 2.01E-02 | TCDD up vs DMSO |
| MIMAT0015030 | hsa-miR-3156-5p  | 1.20 | 1.65E-02 | TCDD up vs DMSO |
| MIMAT0019209 | hsa-miR-3156-3p  | 1.20 | 1.65E-02 | TCDD up vs DMSO |
| MIMAT0021019 | hsa-miR-5000-5p  | 1.19 | 1.65E-02 | TCDD up vs DMSO |
| MIMAT0021020 | hsa-miR-5000-3p  | 1.19 | 1.65E-02 | TCDD up vs DMSO |
| MIMAT0004588 | hsa-miR-27b-5p   | 1.19 | 3.04E-02 | TCDD up vs DMSO |
| MIMAT0000419 | hsa-miR-27b-3p   | 1.19 | 3.04E-02 | TCDD up vs DMSO |
| MIMAT0016856 | hsa-miR-4303     | 1.18 | 1.50E-02 | TCDD up vs DMSO |
| MIMAT0004694 | hsa-miR-342-5p   | 1.18 | 4.21E-02 | TCDD up vs DMSO |
| MIMAT0005449 | hsa-miR-523-5p   | 1.17 | 4.90E-02 | TCDD up vs DMSO |
| MIMAT0002840 | hsa-miR-523-3p   | 1.17 | 4.90E-02 | TCDD up vs DMSO |
| MIMAT0019977 | hsa-miR-4799-3p  | 1.17 | 2.41E-02 | TCDD up vs DMSO |
| MIMAT0019819 | hsa-miR-4712-3p  | 1.17 | 2.71E-02 | TCDD up vs DMSO |
| MIMAT0002808 | hsa-miR-511-5p   | 1.17 | 2.30E-02 | TCDD up vs DMSO |
| MIMAT0018114 | hsa-miR-3686     | 1.17 | 1.44E-02 | TCDD up vs DMSO |
| MIMAT0006789 | hsa-miR-1468-5p  | 1.16 | 2.16E-02 | TCDD up vs DMSO |
| MIMAT0018353 | hsa-miR-3938     | 1.16 | 4.98E-04 | TCDD up vs DMSO |
| MIMAT0019063 | hsa-miR-4524a-3p | 1.16 | 1.50E-03 | TCDD up vs DMSO |
| MIMAT0000266 | hsa-miR-205-5p   | 1.15 | 3.50E-02 | TCDD up vs DMSO |
| MIMAT0009197 | hsa-miR-205-3p   | 1.15 | 3.50E-02 | TCDD up vs DMSO |
| MIMAT0028217 | hsa-miR-7153-3p  | 1.15 | 4.47E-02 | TCDD up vs DMSO |
| MIMAT0000714 | hsa-miR-302b-5p  | 1.15 | 2.14E-02 | TCDD up vs DMSO |
| MIMAT0000715 | hsa-miR-302b-3p  | 1.15 | 2.14E-02 | TCDD up vs DMSO |
| MIMAT0016916 | hsa-miR-4286     | 1.14 | 2.81E-06 | TCDD up vs DMSO |
| MIMAT0027373 | hsa-miR-6736-5p  | 1.14 | 3.95E-02 | TCDD up vs DMSO |
| MIMAT0009979 | hsa-miR-2054     | 1.13 | 2.66E-02 | TCDD up vs DMSO |
| MIMAT0014989 | hsa-miR-3126-5p  | 1.13 | 4.02E-02 | TCDD up vs DMSO |
| MIMAT0015377 | hsa-miR-3126-3p  | 1.13 | 4.02E-02 | TCDD up vs DMSO |
| MIMAT0003295 | hsa-miR-626      | 1.12 | 3.49E-02 | TCDD up vs DMSO |
| MIMAT0018070 | hsa-miR-3650     | 1.12 | 3.23E-04 | TCDD up vs DMSO |
| MIMAT0021082 | hsa-miR-5090     | 1.11 | 1.07E-02 | TCDD up vs DMSO |
| MIMAT0022260 | hsa-miR-5572     | 1.10 | 2.71E-03 | TCDD up vs DMSO |
| MIMAT0022299 | hsa-miR-5590-5p  | 1.10 | 2.72E-02 | TCDD up vs DMSO |
| MIMAT0004805 | hsa-miR-616-3p   | 1.10 | 1.99E-02 | TCDD up vs DMSO |
| MIMAT0004748 | hsa-miR-423-5p   | 1.09 | 4.75E-02 | TCDD up vs DMSO |
| MIMAT0001340 | hsa-miR-423-3p   | 1.09 | 4.75E-02 | TCDD up vs DMSO |
| MIMAT0000276 | hsa-miR-219a-5p  | 1.08 | 7.34E-04 | TCDD up vs DMSO |
| MIMAT0019005 | hsa-miR-4477b    | 1.06 | 2.80E-02 | TCDD up vs DMSO |

|              |                 |       |          |                   |
|--------------|-----------------|-------|----------|-------------------|
| MIMAT0000063 | hsa-let-7b-5p   | 1.05  | 3.74E-02 | TCDD up vs DMSO   |
| MIMAT0018443 | hsa-miR-374c-5p | 1.04  | 1.92E-02 | TCDD up vs DMSO   |
| MIMAT0022735 | hsa-miR-374c-3p | 1.04  | 1.92E-02 | TCDD up vs DMSO   |
| MIMAT0019758 | hsa-miR-4676-5p | -1.08 | 3.28E-02 | TCDD down vs DMSO |
| MIMAT0019759 | hsa-miR-4676-3p | -1.08 | 3.28E-02 | TCDD down vs DMSO |
| MIMAT0019028 | hsa-miR-4493    | -1.08 | 3.88E-02 | TCDD down vs DMSO |
| MIMAT0018981 | hsa-miR-4459    | -1.09 | 4.14E-02 | TCDD down vs DMSO |
| MIMAT0014987 | hsa-miR-548s    | -1.10 | 1.97E-02 | TCDD down vs DMSO |
| MIMAT0003316 | hsa-miR-646     | -1.10 | 4.03E-02 | TCDD down vs DMSO |
| MIMAT0000098 | hsa-miR-100-5p  | -1.11 | 3.11E-02 | TCDD down vs DMSO |
| MIMAT0004512 | hsa-miR-100-3p  | -1.11 | 3.11E-02 | TCDD down vs DMSO |
| MIMAT0027650 | hsa-miR-6875-5p | -1.11 | 4.74E-02 | TCDD down vs DMSO |
| MIMAT0014978 | hsa-miR-3116    | -1.11 | 3.83E-02 | TCDD down vs DMSO |
| MIMAT0023712 | hsa-miR-6087    | -1.11 | 2.06E-02 | TCDD down vs DMSO |
| MIMAT0018925 | hsa-miR-1268b   | -1.11 | 4.95E-02 | TCDD down vs DMSO |
| MIMAT0003226 | hsa-miR-562     | -1.11 | 8.72E-03 | TCDD down vs DMSO |
| MIMAT0019956 | hsa-miR-4787-5p | -1.12 | 3.51E-02 | TCDD down vs DMSO |
| MIMAT0005918 | hsa-miR-1265    | -1.12 | 4.85E-02 | TCDD down vs DMSO |
| MIMAT0011156 | hsa-miR-2114-5p | -1.12 | 4.66E-02 | TCDD down vs DMSO |
| MIMAT0007885 | hsa-miR-1911-5p | -1.12 | 1.95E-03 | TCDD down vs DMSO |
| MIMAT0001631 | hsa-miR-451a    | -1.14 | 3.13E-03 | TCDD down vs DMSO |
| MIMAT0003329 | hsa-miR-411-5p  | -1.14 | 3.31E-02 | TCDD down vs DMSO |
| MIMAT0004813 | hsa-miR-411-3p  | -1.14 | 3.31E-02 | TCDD down vs DMSO |
| MIMAT0025844 | hsa-miR-6716-5p | -1.14 | 4.53E-02 | TCDD down vs DMSO |
| MIMAT0025845 | hsa-miR-6716-3p | -1.14 | 4.53E-02 | TCDD down vs DMSO |
| MIMAT0004701 | hsa-miR-338-5p  | -1.14 | 2.58E-02 | TCDD down vs DMSO |
| MIMAT0000763 | hsa-miR-338-3p  | -1.14 | 2.58E-02 | TCDD down vs DMSO |
| MIMAT0016904 | hsa-miR-4276    | -1.14 | 4.95E-02 | TCDD down vs DMSO |
| MIMAT0027374 | hsa-miR-6736-3p | -1.15 | 4.34E-02 | TCDD down vs DMSO |
| MIMAT0028113 | hsa-miR-7108-5p | -1.15 | 3.44E-02 | TCDD down vs DMSO |
| MIMAT0010313 | hsa-miR-762     | -1.16 | 1.44E-02 | TCDD down vs DMSO |
| MIMAT0019778 | hsa-miR-4689    | -1.16 | 1.82E-02 | TCDD down vs DMSO |
| MIMAT0028230 | hsa-miR-7160-5p | -1.16 | 1.56E-03 | TCDD down vs DMSO |
| MIMAT0028231 | hsa-miR-7160-3p | -1.16 | 1.56E-03 | TCDD down vs DMSO |
| MIMAT0001532 | hsa-miR-448     | -1.17 | 2.43E-02 | TCDD down vs DMSO |
| MIMAT0019841 | hsa-miR-4724-5p | -1.17 | 2.20E-02 | TCDD down vs DMSO |
| MIMAT0019842 | hsa-miR-4724-3p | -1.17 | 2.20E-02 | TCDD down vs DMSO |
| MIMAT0030424 | hsa-miR-7849-3p | -1.17 | 3.81E-02 | TCDD down vs DMSO |
| MIMAT0024598 | hsa-miR-6125    | -1.17 | 3.99E-02 | TCDD down vs DMSO |
| MIMAT0015022 | hsa-miR-3149    | -1.17 | 4.20E-02 | TCDD down vs DMSO |
| MIMAT0022491 | hsa-miR-5698    | -1.17 | 2.30E-02 | TCDD down vs DMSO |
| MIMAT0004503 | hsa-miR-29a-5p  | -1.17 | 3.38E-02 | TCDD down vs DMSO |
| MIMAT0000086 | hsa-miR-29a-3p  | -1.17 | 3.38E-02 | TCDD down vs DMSO |

|              |                  |       |          |                   |
|--------------|------------------|-------|----------|-------------------|
| MIMAT0019729 | hsa-miR-4661-5p  | -1.18 | 3.73E-02 | TCDD down vs DMSO |
| MIMAT0019730 | hsa-miR-4661-3p  | -1.18 | 3.73E-02 | TCDD down vs DMSO |
| MIMAT0027387 | hsa-miR-6743-5p  | -1.18 | 4.67E-02 | TCDD down vs DMSO |
| MIMAT0024613 | hsa-miR-6129     | -1.18 | 3.47E-02 | TCDD down vs DMSO |
| MIMAT0019948 | hsa-miR-4784     | -1.18 | 4.86E-02 | TCDD down vs DMSO |
| MIMAT0019944 | hsa-miR-4782-5p  | -1.18 | 2.58E-02 | TCDD down vs DMSO |
| MIMAT0019945 | hsa-miR-4782-3p  | -1.18 | 2.58E-02 | TCDD down vs DMSO |
| MIMAT0007347 | hsa-miR-1469     | -1.19 | 5.04E-03 | TCDD down vs DMSO |
| MIMAT0019229 | hsa-miR-3940-5p  | -1.19 | 2.61E-02 | TCDD down vs DMSO |
| MIMAT0019766 | hsa-miR-4681     | -1.19 | 2.81E-03 | TCDD down vs DMSO |
| MIMAT0016915 | hsa-miR-4284     | -1.19 | 3.74E-02 | TCDD down vs DMSO |
| MIMAT0024782 | hsa-miR-6165     | -1.19 | 4.41E-02 | TCDD down vs DMSO |
| MIMAT0005911 | hsa-miR-1260a    | -1.19 | 4.59E-03 | TCDD down vs DMSO |
| MIMAT0018989 | hsa-miR-548ai    | -1.19 | 2.13E-02 | TCDD down vs DMSO |
| MIMAT0005955 | hsa-miR-1197     | -1.20 | 2.06E-02 | TCDD down vs DMSO |
| MIMAT0028219 | hsa-miR-7154-3p  | -1.20 | 1.19E-02 | TCDD down vs DMSO |
| MIMAT0005829 | hsa-miR-1184     | -1.20 | 3.32E-02 | TCDD down vs DMSO |
| MIMAT0005885 | hsa-miR-1295a    | -1.20 | 2.14E-02 | TCDD down vs DMSO |
| MIMAT0005950 | hsa-miR-1306-3p  | -1.21 | 3.64E-02 | TCDD down vs DMSO |
| MIMAT0017992 | hsa-miR-3614-5p  | -1.21 | 2.08E-03 | TCDD down vs DMSO |
| MIMAT0017993 | hsa-miR-3614-3p  | -1.21 | 2.08E-03 | TCDD down vs DMSO |
| MIMAT0019062 | hsa-miR-4524a-5p | -1.21 | 4.64E-02 | TCDD down vs DMSO |
| MIMAT0027648 | hsa-miR-6874-5p  | -1.21 | 1.76E-03 | TCDD down vs DMSO |
| MIMAT0027359 | hsa-miR-6729-5p  | -1.21 | 1.29E-02 | TCDD down vs DMSO |
| MIMAT0022923 | hsa-miR-376b-5p  | -1.21 | 3.75E-02 | TCDD down vs DMSO |
| MIMAT0002172 | hsa-miR-376b-3p  | -1.21 | 3.75E-02 | TCDD down vs DMSO |
| MIMAT0005919 | hsa-miR-548o-3p  | -1.22 | 2.07E-02 | TCDD down vs DMSO |
| MIMAT0000724 | hsa-miR-372-3p   | -1.22 | 3.44E-02 | TCDD down vs DMSO |
| MIMAT0001536 | hsa-miR-429      | -1.23 | 3.04E-02 | TCDD down vs DMSO |
| MIMAT0003150 | hsa-miR-455-5p   | -1.23 | 4.81E-02 | TCDD down vs DMSO |
| MIMAT0004784 | hsa-miR-455-3p   | -1.23 | 4.81E-02 | TCDD down vs DMSO |
| MIMAT0019712 | hsa-miR-4649-3p  | -1.23 | 1.59E-02 | TCDD down vs DMSO |
| MIMAT0019874 | hsa-miR-4743-5p  | -1.24 | 1.47E-02 | TCDD down vs DMSO |
| MIMAT0022978 | hsa-miR-4743-3p  | -1.24 | 1.47E-02 | TCDD down vs DMSO |
| MIMAT0027602 | hsa-miR-6851-5p  | -1.24 | 2.20E-02 | TCDD down vs DMSO |
| MIMAT0027603 | hsa-miR-6851-3p  | -1.24 | 2.20E-02 | TCDD down vs DMSO |
| MIMAT0011157 | hsa-miR-2114-3p  | -1.24 | 2.80E-02 | TCDD down vs DMSO |
| MIMAT0019942 | hsa-miR-4781-5p  | -1.24 | 1.70E-02 | TCDD down vs DMSO |
| MIMAT0021084 | hsa-miR-5092     | -1.25 | 1.26E-02 | TCDD down vs DMSO |
| MIMAT0018958 | hsa-miR-4440     | -1.25 | 2.46E-02 | TCDD down vs DMSO |
| MIMAT0028119 | hsa-miR-7111-5p  | -1.25 | 4.94E-02 | TCDD down vs DMSO |
| MIMAT0028120 | hsa-miR-7111-3p  | -1.25 | 4.94E-02 | TCDD down vs DMSO |
| MIMAT0027365 | hsa-miR-6732-5p  | -1.25 | 3.92E-02 | TCDD down vs DMSO |

|              |                  |       |          |                   |
|--------------|------------------|-------|----------|-------------------|
| MIMAT0019796 | hsa-miR-4700-5p  | -1.26 | 1.27E-02 | TCDD down vs DMSO |
| MIMAT0014998 | hsa-miR-3133     | -1.26 | 3.77E-02 | TCDD down vs DMSO |
| MIMAT0000448 | hsa-miR-136-5p   | -1.26 | 3.13E-02 | TCDD down vs DMSO |
| MIMAT0004606 | hsa-miR-136-3p   | -1.26 | 3.13E-02 | TCDD down vs DMSO |
| MIMAT0027412 | hsa-miR-6756-5p  | -1.27 | 4.23E-02 | TCDD down vs DMSO |
| MIMAT0027413 | hsa-miR-6756-3p  | -1.27 | 4.23E-02 | TCDD down vs DMSO |
| MIMAT0015031 | hsa-miR-3157-5p  | -1.27 | 4.05E-02 | TCDD down vs DMSO |
| MIMAT0019210 | hsa-miR-3157-3p  | -1.27 | 4.05E-02 | TCDD down vs DMSO |
| MIMAT0030426 | hsa-miR-7851-3p  | -1.27 | 4.91E-02 | TCDD down vs DMSO |
| MIMAT0005452 | hsa-miR-519a-5p  | -1.27 | 1.21E-03 | TCDD down vs DMSO |
| MIMAT0002869 | hsa-miR-519a-3p  | -1.27 | 1.21E-03 | TCDD down vs DMSO |
| MIMAT0015040 | hsa-miR-3166     | -1.28 | 2.99E-02 | TCDD down vs DMSO |
| MIMAT0027659 | hsa-miR-6879-3p  | -1.28 | 4.46E-02 | TCDD down vs DMSO |
| MIMAT0018189 | hsa-miR-3915     | -1.28 | 2.31E-03 | TCDD down vs DMSO |
| MIMAT0018351 | hsa-miR-3936     | -1.28 | 1.77E-02 | TCDD down vs DMSO |
| MIMAT0016847 | hsa-miR-378c     | -1.28 | 2.71E-02 | TCDD down vs DMSO |
| MIMAT0004971 | hsa-miR-921      | -1.28 | 4.36E-02 | TCDD down vs DMSO |
| MIMAT0019198 | hsa-miR-3120-5p  | -1.28 | 3.62E-02 | TCDD down vs DMSO |
| MIMAT0014982 | hsa-miR-3120-3p  | -1.28 | 3.62E-02 | TCDD down vs DMSO |
| MIMAT0026555 | hsa-miR-329-5p   | -1.29 | 6.87E-03 | TCDD down vs DMSO |
| MIMAT0001629 | hsa-miR-329-3p   | -1.29 | 6.87E-03 | TCDD down vs DMSO |
| MIMAT0004909 | hsa-miR-450b-5p  | -1.29 | 4.31E-02 | TCDD down vs DMSO |
| MIMAT0018179 | hsa-miR-3907     | -1.30 | 2.22E-02 | TCDD down vs DMSO |
| MIMAT0019002 | hsa-miR-4475     | -1.30 | 2.25E-02 | TCDD down vs DMSO |
| MIMAT0016865 | hsa-miR-4313     | -1.31 | 4.82E-02 | TCDD down vs DMSO |
| MIMAT0019025 | hsa-miR-4490     | -1.32 | 3.83E-02 | TCDD down vs DMSO |
| MIMAT0016918 | hsa-miR-4288     | -1.32 | 2.57E-02 | TCDD down vs DMSO |
| MIMAT0019060 | hsa-miR-4522     | -1.32 | 1.43E-02 | TCDD down vs DMSO |
| MIMAT0005881 | hsa-miR-1291     | -1.33 | 1.63E-03 | TCDD down vs DMSO |
| MIMAT0027640 | hsa-miR-6870-5p  | -1.33 | 2.54E-02 | TCDD down vs DMSO |
| MIMAT0027641 | hsa-miR-6870-3p  | -1.33 | 2.54E-02 | TCDD down vs DMSO |
| MIMAT0019211 | hsa-miR-3158-5p  | -1.34 | 3.29E-02 | TCDD down vs DMSO |
| MIMAT0015032 | hsa-miR-3158-3p  | -1.34 | 3.29E-02 | TCDD down vs DMSO |
| MIMAT0015088 | hsa-miR-514b-3p  | -1.34 | 3.96E-02 | TCDD down vs DMSO |
| MIMAT0005823 | hsa-miR-1178-3p  | -1.34 | 2.83E-03 | TCDD down vs DMSO |
| MIMAT0002845 | hsa-miR-526a     | -1.34 | 2.36E-02 | TCDD down vs DMSO |
| MIMAT0019010 | hsa-miR-3689f    | -1.37 | 1.55E-02 | TCDD down vs DMSO |
| MIMAT0015081 | hsa-miR-548x-3p  | -1.37 | 2.57E-04 | TCDD down vs DMSO |
| MIMAT0032115 | hsa-miR-548ae-5p | -1.37 | 4.77E-02 | TCDD down vs DMSO |
| MIMAT0018954 | hsa-miR-548ae-3p | -1.37 | 4.77E-02 | TCDD down vs DMSO |
| MIMAT0005795 | hsa-miR-1323     | -1.38 | 1.30E-02 | TCDD down vs DMSO |
| MIMAT0019981 | hsa-miR-4802-5p  | -1.38 | 2.89E-02 | TCDD down vs DMSO |
| MIMAT0018119 | hsa-miR-3690     | -1.39 | 1.18E-02 | TCDD down vs DMSO |

|              |                  |       |          |                   |
|--------------|------------------|-------|----------|-------------------|
| MIMAT0015018 | hsa-miR-3146     | -1.40 | 1.23E-02 | TCDD down vs DMSO |
| MIMAT0015010 | hsa-miR-3141     | -1.40 | 3.99E-02 | TCDD down vs DMSO |
| MIMAT0019887 | hsa-miR-4750-5p  | -1.40 | 4.77E-02 | TCDD down vs DMSO |
| MIMAT0019007 | hsa-miR-3689c    | -1.40 | 1.69E-03 | TCDD down vs DMSO |
| MIMAT0018990 | hsa-miR-548aj-3p | -1.41 | 8.33E-03 | TCDD down vs DMSO |
| MIMAT0027684 | hsa-miR-6892-5p  | -1.41 | 1.07E-02 | TCDD down vs DMSO |
| MIMAT0027685 | hsa-miR-6892-3p  | -1.41 | 1.07E-02 | TCDD down vs DMSO |
| MIMAT0027592 | hsa-miR-6846-5p  | -1.43 | 3.32E-02 | TCDD down vs DMSO |
| MIMAT0027593 | hsa-miR-6846-3p  | -1.43 | 3.32E-02 | TCDD down vs DMSO |
| MIMAT0019805 | hsa-miR-4705     | -1.43 | 3.35E-02 | TCDD down vs DMSO |
| MIMAT0027595 | hsa-miR-6847-3p  | -1.49 | 2.95E-02 | TCDD down vs DMSO |
| MIMAT0019042 | hsa-miR-4506     | -1.49 | 3.60E-02 | TCDD down vs DMSO |
| MIMAT0027366 | hsa-miR-6732-3p  | -1.52 | 4.79E-03 | TCDD down vs DMSO |
| MIMAT0000756 | hsa-miR-326      | -1.53 | 8.87E-03 | TCDD down vs DMSO |
| MIMAT0019026 | hsa-miR-4491     | -1.56 | 2.76E-02 | TCDD down vs DMSO |
| MIMAT0027682 | hsa-miR-6891-5p  | -1.64 | 3.25E-02 | TCDD down vs DMSO |
| MIMAT0025468 | hsa-miR-6506-5p  | -1.66 | 1.04E-02 | TCDD down vs DMSO |
| MIMAT0006790 | hsa-miR-675-3p   | -1.67 | 3.80E-02 | TCDD down vs DMSO |
| MIMAT0025472 | hsa-miR-6508-5p  | -1.75 | 3.47E-02 | TCDD down vs DMSO |
| MIMAT0027538 | hsa-miR-6819-5p  | -1.83 | 2.23E-02 | TCDD down vs DMSO |
| MIMAT0027539 | hsa-miR-6819-3p  | -1.83 | 2.23E-02 | TCDD down vs DMSO |
| MIMAT0016862 | hsa-miR-4310     | -2.88 | 2.74E-02 | TCDD down vs DMSO |

Supplementary table 2: A list of reported target genes of hsa-miR-608

| Gene ID | Symbol | Description                                    | Cell/tissue                                              | Reference |
|---------|--------|------------------------------------------------|----------------------------------------------------------|-----------|
| 6469    | SHH    | sonic hedgehog                                 | Human chondrocytes                                       | 1         |
| 595     | CCND1  | cyclin D1                                      | A549 tumor cells (human alveolar basal epithelial cells) | 2         |
| 1727    | CYB5R3 | cytochrome b5 reductase 3                      |                                                          |           |
| 5296    | PIK3R2 | phosphoinositide-3-kinase regulatory subunit 2 |                                                          |           |
| 6667    | SP1    | Sp1 transcription factor                       |                                                          |           |
| 207     | AKT1   | AKT serine/threonine kinase 1                  |                                                          |           |
| 43      | ACHE   | acetylcholinesterase (Cartwright blood group)  | Human U937 cells and HEK-293T cell lines                 | 3         |
| 960     | CD44   | CD44 molecule (Indian blood group)             | Human breast cancer cell lines                           | 4         |
| 998     | CDC42  | cell division cycle 42                         | Human breast cancer cell lines                           | 4         |
|         |        |                                                | Human U937 cells and HEK-293T cell lines                 | 3         |
| 1289    | COL5A1 | collagen type V alpha 1 chain                  | HT1080 cell lines                                        | 5         |
| 3569    | IL6    | interleukin 6                                  | Human U937 cells and                                     | 3         |



|      |        |                                                                          |                                  |    |
|------|--------|--------------------------------------------------------------------------|----------------------------------|----|
|      |        |                                                                          | HEK-293T cell lines              |    |
|      |        |                                                                          | HEK293 and Hela cell lines       | 6  |
|      |        |                                                                          | HEK293 and Hela cell lines       | 7  |
| 4282 | MIF    | macrophage migration inhibitory factor (glycosylation-inhibiting factor) | Human hepatocellular carcinoma   | 8  |
|      |        |                                                                          | Human glioma stem cells          | 9  |
| 8260 | NAA10  | N(alpha)-acetyltransferase 10, NatA catalytic subunit                    | Human SW480 and SW620 cell lines | 10 |
| 599  | BCL2L2 | BCL2 like 2                                                              | Human chordoma cell              | 11 |
| 598  | BCL2L1 | BCL2 like 1                                                              | Human chordoma cell              | 11 |
|      |        |                                                                          | A549 tumor cells                 | 2  |
| 1956 | EGFR   | epidermal growth factor receptor                                         | Human chordoma cell lines        | 11 |
| 4233 | MET    | MET proto-oncogene, receptor tyrosine kinase                             |                                  |    |

## Reference

- 1 Akhtar, N., Makki, M. S. & Haqqi, T. M. MicroRNA-602 and microRNA-608 regulate sonic hedgehog expression via target sites in the coding region in human chondrocytes. *Arthritis & rheumatology* **67**, 423-434, doi:10.1002/art.38952 (2015).
- 2 Choi, Y. C. *et al.* MicroRNA library screening identifies growth-suppressive microRNAs that regulate genes involved in cell cycle progression and apoptosis. *Experimental cell research*, doi:10.1016/j.yexcr.2015.10.012 (2015).
- 3 Hanin, G. *et al.* Competing targets of microRNA-608 affect anxiety and hypertension. *Human molecular genetics* **23**, 4569-4580, doi:10.1093/hmg/ddu170 (2014).
- 4 Jeyapalan, Z. *et al.* Expression of CD44 3'-untranslated region regulates endogenous microRNA functions in tumorigenesis and angiogenesis. *Nucleic Acids Res* **39**, 3026-3041, doi:10.1093/nar/gkq1003 (2011).
- 5 Laguette, M. J., Abrahams, Y., Prince, S. & Collins, M. Sequence variants within the 3'-UTR of the COL5A1 gene alters mRNA stability: implications for musculoskeletal soft tissue injuries. *Matrix biology : journal of the International Society for Matrix Biology* **30**, 338-345, doi:10.1016/j.matbio.2011.05.001 (2011).
- 6 Kang, J. G. *et al.* Kaposi's sarcoma-associated herpesviral IL-6 and human IL-6 open reading frames contain miRNA binding sites and are subject to cellular miRNA regulation. *The Journal of pathology* **225**, 378-389, doi:10.1002/path.2962 (2011).
- 7 Kang, J. G. *et al.* Kaposi's sarcoma-associated herpesvirus ORF57 promotes escape of viral and human interleukin-6 from microRNA-mediated suppression. *Journal of virology* **85**, 2620-2630, doi:10.1128/JVI.02144-10 (2011).
- 8 Wang, K., Liang, Q., Wei, L., Zhang, W. & Zhu, P. MicroRNA-608 acts as a prognostic marker and inhibits the cell proliferation in hepatocellular carcinoma by macrophage migration inhibitory factor. *Tumour biology : the journal of the International Society for Oncodevelopmental Biology and Medicine*, doi:10.1007/s13277-015-4213-5 (2015).
- 9 Wang, Z., Xue, Y., Wang, P., Zhu, J. & Ma, J. MiR-608 inhibits the migration and

invasion of glioma stem cells by targeting macrophage migration inhibitory factor. *Oncology reports* **35**, 2733-2742, doi:10.3892/or.2016.4652 (2016).

- 10 Yang, H. *et al.* microRNA-342-5p and miR-608 inhibit colon cancer tumorigenesis by targeting NAA10. *Oncotarget* **7**, 2709-2720, doi:10.18632/oncotarget.6458 (2016).
- 11 Zhang, Y., Schiff, D., Park, D. & Abounader, R. MicroRNA-608 and microRNA-34a regulate chordoma malignancy by targeting EGFR, Bcl-xL and MET. *PloS one* **9**, e91546, doi:10.1371/journal.pone.0091546 (2014).

Supplementary table 3: A list of 557 predicted target genes of hsa-miR-608

| Gene ID | Symbol    | description                                                               |
|---------|-----------|---------------------------------------------------------------------------|
| 51      | ACOX1     | acyl-CoA oxidase 1, palmitoyl                                             |
| 60      | ACTB      | actin, beta                                                               |
| 91      | ACVR1B    | activin A receptor type IB                                                |
| 105     | ADARB2    | adenosine deaminase, RNA-specific, B2 (inactive)                          |
| 117     | ADCYAP1R1 | adenylate cyclase activating polypeptide 1 (pituitary) receptor type I    |
| 164     | APIG1     | adaptor-related protein complex 1, gamma 1 subunit                        |
| 402     | ARL2      | ADP ribosylation factor like GTPase 2                                     |
| 408     | ARRB1     | arrestin, beta 1                                                          |
| 477     | ATP1A2    | ATPase, Na <sup>+</sup> /K <sup>+</sup> transporting, alpha 2 polypeptide |
| 535     | ATP6V0A1  | ATPase, H <sup>+</sup> transporting, lysosomal V0 subunit a1              |
| 558     | AXL       | AXL receptor tyrosine kinase                                              |
| 578     | BAK1      | BCL2-antagonist/killer 1                                                  |
| 598     | BCL2L1    | BCL2-like 1                                                               |
| 613     | BCR       | breakpoint cluster region                                                 |
| 677     | ZFP36L1   | ZFP36 ring finger protein-like 1                                          |
| 728     | C5AR1     | complement component 5a receptor 1                                        |
| 747     | DAGLA     | diacylglycerol lipase, alpha                                              |
| 775     | CACNA1C   | calcium channel, voltage-dependent, L type, alpha 1C subunit              |
| 794     | CALB2     | calbindin 2                                                               |
| 815     | CAMK2A    | calcium/calmodulin-dependent protein kinase II alpha                      |
| 827     | CAPN6     | calpain 6                                                                 |
| 916     | CD3E      | CD3e molecule, epsilon (CD3-TCR complex)                                  |
| 920     | CD4       | CD4 molecule                                                              |
| 933     | CD22      | CD22 molecule                                                             |
| 954     | ENTPD2    | ectonucleoside triphosphate diphosphohydrolase 2                          |
| 1026    | CDKN1A    | cyclin-dependent kinase inhibitor 1A (p21, Cip1)                          |
| 1030    | CDKN2B    | cyclin-dependent kinase inhibitor 2B (p15, inhibits CDK4)                 |
| 1041    | CDSN      | corneodesmosin                                                            |
| 1050    | CEBPA     | CCAAT/enhancer binding protein (C/EBP), alpha                             |
| 1072    | CFL1      | cofilin 1 (non-muscle)                                                    |
| 1158    | CKM       | creatine kinase, muscle                                                   |
| 1174    | AP1S1     | adaptor-related protein complex 1 sigma 1 subunit                         |
| 1200    | TPP1      | tripeptidyl peptidase I                                                   |

|      |          |                                                                       |
|------|----------|-----------------------------------------------------------------------|
| 1213 | CLTC     | clathrin, heavy chain (Hc)                                            |
| 1306 | COL15A1  | collagen, type XV, alpha 1                                            |
| 1352 | COX10    | COX10 heme A:farnesyltransferase cytochrome c oxidase assembly factor |
| 1355 | COX15    | cytochrome c oxidase assembly homolog 15 (yeast)                      |
| 1398 | CRK      | v-crk avian sarcoma virus CT10 oncogene homolog                       |
| 1465 | CSRP1    | cysteine and glycine rich protein 1                                   |
| 1523 | CUX1     | cut-like homeobox 1                                                   |
| 1627 | DBN1     | drebrin 1                                                             |
| 1727 | CYB5R3   | cytochrome b5 reductase 3                                             |
| 1730 | DIAPH2   | diaphanous related formin 2                                           |
| 1741 | DLG3     | discs, large homolog 3 (Drosophila)                                   |
| 1747 | DLX3     | distal-less homeobox 3                                                |
| 1757 | SARDH    | sarcosine dehydrogenase                                               |
| 1762 | DMWD     | dystrophia myotonica, WD repeat containing                            |
| 1857 | DVL3     | dishevelled segment polarity protein 3                                |
| 1861 | TOR1A    | torsin family 1, member A (torsin A)                                  |
| 1879 | EBF1     | early B-cell factor 1                                                 |
| 1951 | CELSR3   | cadherin, EGF LAG seven-pass G-type receptor 3                        |
| 1952 | CELSR2   | cadherin, EGF LAG seven-pass G-type receptor 2                        |
| 1956 | EGFR     | epidermal growth factor receptor                                      |
| 1981 | EIF4G1   | eukaryotic translation initiation factor 4 gamma, 1                   |
| 1995 | ELAVL3   | ELAV like neuron-specific RNA binding protein 3                       |
| 2006 | ELN      | elastin                                                               |
| 2046 | EPHA8    | EPH receptor A8                                                       |
| 2077 | ERF      | Ets2 repressor factor                                                 |
| 2137 | EXTL3    | exostosin-like glycosyltransferase 3                                  |
| 2185 | PTK2B    | protein tyrosine kinase 2 beta                                        |
| 2354 | FOSB     | FBJ murine osteosarcoma viral oncogene homolog B                      |
| 2538 | G6PC     | glucose-6-phosphatase, catalytic subunit                              |
| 2670 | GFAP     | glial fibrillary acidic protein                                       |
| 2676 | GFRA3    | GDNF family receptor alpha 3                                          |
| 2827 | GPR3     | G protein-coupled receptor 3                                          |
| 2840 | GPR17    | G protein-coupled receptor 17                                         |
| 2872 | MKMK2    | MAP kinase interacting serine/threonine kinase 2                      |
| 2874 | GPS2     | G protein pathway suppressor 2                                        |
| 2878 | GPX3     | glutathione peroxidase 3                                              |
| 2879 | GPX4     | glutathione peroxidase 4                                              |
| 2890 | GRIA1    | glutamate receptor, ionotropic, AMPA 1                                |
| 2903 | GRIN2A   | glutamate receptor, ionotropic, N-methyl D-aspartate 2A               |
| 2909 | ARHGAP35 | Rho GTPase activating protein 35                                      |
| 2997 | GYS1     | glycogen synthase 1 (muscle)                                          |
| 3005 | H1F0     | H1 histone family member 0                                            |

|      |        |                                                                          |
|------|--------|--------------------------------------------------------------------------|
| 3149 | HMGB3  | high mobility group box 3                                                |
| 3159 | HMGA1  | high mobility group AT-hook 1                                            |
| 3170 | FOXA2  | forkhead box A2                                                          |
| 3190 | HNRNPK | heterogeneous nuclear ribonucleoprotein K                                |
| 3213 | HOXB3  | homeobox B3                                                              |
| 3223 | HOXC6  | homeobox C6                                                              |
| 3229 | HOXC13 | homeobox C13                                                             |
| 3339 | HSPG2  | heparan sulfate proteoglycan 2                                           |
| 3340 | NDST1  | N-deacetylase/N-sulfotransferase (heparan glucosaminyl) 1                |
| 3488 | IGFBP5 | insulin like growth factor binding protein 5                             |
| 3549 | IHH    | indian hedgehog                                                          |
| 3560 | IL2RB  | interleukin 2 receptor, beta                                             |
| 3692 | EIF6   | eukaryotic translation initiation factor 6                               |
| 3707 | ITPKB  | inositol-trisphosphate 3-kinase B                                        |
| 3748 | KCNC3  | potassium channel, voltage gated Shaw related subfamily C, member 3      |
| 3756 | KCNH1  | potassium channel, voltage gated eag related subfamily H, member 1       |
| 3897 | L1CAM  | L1 cell adhesion molecule                                                |
| 4059 | BCAM   | basal cell adhesion molecule (Lutheran blood group)                      |
| 4150 | MAZ    | MYC-associated zinc finger protein (purine-binding transcription factor) |
| 4204 | MECP2  | methyl-CpG binding protein 2                                             |
| 4209 | MEF2D  | myocyte enhancer factor 2D                                               |
| 4215 | MAP3K3 | mitogen-activated protein kinase kinase kinase 3                         |
| 4222 | MEOX1  | mesenchyme homeobox 1                                                    |
| 4237 | MFAP2  | microfibrillar associated protein 2                                      |
| 4261 | CIITA  | class II, major histocompatibility complex, transactivator               |
| 4277 | MICB   | MHC class I polypeptide-related sequence B                               |
| 4303 | FOXO4  | forkhead box O4                                                          |
| 4324 | MMP15  | matrix metalloproteinase 15 (membrane-inserted)                          |
| 4335 | MNT    | MAX network transcriptional repressor                                    |
| 4355 | MPP2   | membrane protein, palmitoylated 2                                        |
| 4478 | MSN    | moesin                                                                   |
| 4440 | MSI1   | musashi RNA binding protein 1                                            |
| 4647 | MYO7A  | myosin VIIA                                                              |
| 4648 | MYO7B  | myosin VIIB                                                              |
| 4656 | MYOG   | myogenin (myogenic factor 4)                                             |
| 4668 | NAGA   | N-acetylgalactosaminidase, alpha-                                        |
| 4763 | NF1    | neurofibromin 1                                                          |
| 4782 | NFIC   | nuclear factor I/C (CCAAT-binding transcription factor)                  |
| 4807 | NHLH1  | nescient helix-loop-helix 1                                              |
| 4851 | NOTCH1 | notch 1                                                                  |
| 4900 | NRGN   | neurogranin                                                              |
| 4915 | NTRK2  | neurotrophic tyrosine kinase, receptor, type 2                           |

|      |         |                                                                                                   |
|------|---------|---------------------------------------------------------------------------------------------------|
| 4923 | NTSR1   | neurotensin receptor 1 (high affinity)                                                            |
| 5029 | P2RY2   | purinergic receptor P2Y, G-protein coupled, 2                                                     |
| 5045 | FURIN   | furin (paired basic amino acid cleaving enzyme)                                                   |
| 5089 | PBX2    | pre-B-cell leukemia homeobox 2                                                                    |
| 5129 | CDK18   | cyclin-dependent kinase 18                                                                        |
| 5209 | PFKFB3  | 6-phosphofructo-2-kinase/fructose-2,6-biphosphatase 3                                             |
| 5236 | PGM1    | phosphoglucomutase 1                                                                              |
| 5245 | PHB     | prohibitin                                                                                        |
| 5326 | PLAGL2  | pleiomorphic adenoma gene-like 2                                                                  |
| 5360 | PLTP    | phospholipid transfer protein                                                                     |
| 5396 | PRRX1   | paired related homeobox 1                                                                         |
| 5478 | PPIA    | peptidylprolyl isomerase A (cyclophilin A)                                                        |
| 5566 | PRKACA  | protein kinase, cAMP-dependent, alpha catalytic subunit                                           |
| 5582 | PRKCG   | protein kinase C, gamma                                                                           |
| 5589 | PRKCSH  | protein kinase C substrate 80K-H                                                                  |
| 5618 | PRLR    | prolactin receptor                                                                                |
| 5662 | PSD     | pleckstrin and Sec7 domain containing                                                             |
| 5739 | PTGIR   | prostaglandin I2 (prostacyclin) receptor (IP)                                                     |
| 5781 | PTPN11  | protein tyrosine phosphatase, non-receptor type 11                                                |
| 5784 | PTPN14  | protein tyrosine phosphatase, non-receptor type 14                                                |
| 5818 | PVRL1   | poliovirus receptor-related 1 (herpesvirus entry mediator C)                                      |
| 5869 | RAB5B   | RAB5B, member RAS oncogene family                                                                 |
| 5880 | RAC2    | ras-related C3 botulinum toxin substrate 2 (rho family, small GTP binding protein Rac2)           |
| 5947 | RBP1    | retinol binding protein 1, cellular                                                               |
| 5957 | RCVRN   | recoverin                                                                                         |
| 5977 | DPF2    | D4, zinc and double PHD fingers family 2                                                          |
| 6196 | RPS6KA2 | ribosomal protein S6 kinase, 90kDa, polypeptide 2                                                 |
| 6239 | RREB1   | ras responsive element binding protein 1                                                          |
| 6272 | SORT1   | sortilin 1                                                                                        |
| 6327 | SCN2B   | sodium channel, voltage gated, type II beta subunit                                               |
| 6334 | SCN8A   | sodium channel, voltage gated, type VIII alpha subunit                                            |
| 6338 | SCNN1B  | sodium channel, non voltage gated 1 beta subunit                                                  |
| 6366 | CCL21   | chemokine (C-C motif) ligand 21                                                                   |
| 6376 | CX3CL1  | chemokine (C-X3-C motif) ligand 1                                                                 |
| 6439 | SFTPB   | surfactant protein B                                                                              |
| 6461 | SHB     | Src homology 2 domain containing adaptor protein B                                                |
| 6512 | SLC1A7  | solute carrier family 1 (glutamate transporter), member 7                                         |
| 6543 | SLC8A2  | solute carrier family 8 (sodium/calcium exchanger), member 2                                      |
| 6578 | SLCO2A1 | solute carrier organic anion transporter family member 2A1                                        |
| 6599 | SMARCC1 | SWI/SNF related, matrix associated, actin dependent regulator of chromatin, subfamily c, member 1 |
| 6601 | SMARCC2 | SWI/SNF related, matrix associated, actin dependent regulator of                                  |

|      |         |                                                                                                   |
|------|---------|---------------------------------------------------------------------------------------------------|
|      |         | chromatin, subfamily c, member 2                                                                  |
| 6602 | SMARCD1 | SWI/SNF related, matrix associated, actin dependent regulator of chromatin, subfamily d, member 1 |
| 6612 | SUMO3   | small ubiquitin-like modifier 3                                                                   |
| 6649 | SOD3    | superoxide dismutase 3, extracellular                                                             |
| 6663 | SOX10   | SRY-box 10                                                                                        |
| 6666 | SOX12   | SRY-box 12                                                                                        |
| 6768 | ST14    | suppression of tumorigenicity 14                                                                  |
| 6777 | STAT5B  | signal transducer and activator of transcription 5B                                               |
| 6781 | STC1    | stanniocalcin 1                                                                                   |
| 6804 | STX1A   | syntaxin 1A                                                                                       |
| 6844 | VAMP2   | vesicle associated membrane protein 2                                                             |
| 6855 | SYP     | synaptophysin                                                                                     |
| 6861 | SYT5    | synaptotagmin 5                                                                                   |
| 6900 | CNTN2   | contactin 2 (axonal)                                                                              |
| 6911 | TBX6    | T-box 6                                                                                           |
| 6943 | TCF21   | transcription factor 21                                                                           |
| 7009 | TMBIM6  | transmembrane BAX inhibitor motif containing 6                                                    |
| 7023 | TFAP4   | transcription factor AP-4 (activating enhancer binding protein 4)                                 |
| 7030 | TFE3    | transcription factor binding to IGHM enhancer 3                                                   |
| 7056 | THBD    | thrombomodulin                                                                                    |
| 7090 | TLE3    | transducin like enhancer of split 3                                                               |
| 7111 | TMOD1   | tropomodulin 1                                                                                    |
| 7126 | TNFAIP1 | TNF alpha induced protein 1                                                                       |
| 7145 | TNS1    | tensin 1                                                                                          |
| 7392 | USF2    | upstream transcription factor 2, c-fos interacting                                                |
| 7421 | VDR     | vitamin D (1,25- dihydroxyvitamin D3) receptor                                                    |
| 7531 | YWHAE   | tyrosine 3-monooxygenase/tryptophan 5-monooxygenase activation protein, epsilon                   |
| 7533 | YWHAH   | tyrosine 3-monooxygenase/tryptophan 5-monooxygenase activation protein, eta                       |
| 7579 | ZSCAN20 | zinc finger and SCAN domain containing 20                                                         |
| 7621 | ZNF70   | zinc finger protein 70                                                                            |
| 7745 | ZKSCAN8 | zinc finger with KRAB and SCAN domains 8                                                          |
| 8000 | PSCA    | prostate stem cell antigen                                                                        |
| 8030 | CCDC6   | coiled-coil domain containing 6                                                                   |
| 8085 | KMT2D   | lysine (K)-specific methyltransferase 2D                                                          |
| 8128 | ST8SIA2 | ST8 alpha-N-acetyl-neuraminide alpha-2,8-sialyltransferase 2                                      |
| 8153 | RND2    | Rho family GTPase 2                                                                               |
| 8227 | AKAP17A | A-kinase anchoring protein 17A                                                                    |
| 8303 | SNN     | stannin                                                                                           |
| 8325 | FZD8    | frizzled class receptor 8                                                                         |
| 8396 | PIP4K2B | phosphatidylinositol-5-phosphate 4-kinase, type II, beta                                          |

|       |          |                                                                        |
|-------|----------|------------------------------------------------------------------------|
| 8398  | PLA2G6   | phospholipase A2 group VI                                              |
| 8463  | TEAD2    | TEA domain family member 2                                             |
| 8514  | KCNAB2   | potassium channel, voltage gated subfamily A regulatory beta subunit 2 |
| 8525  | DGKZ     | diacylglycerol kinase, zeta                                            |
| 8554  | PIAS1    | protein inhibitor of activated STAT 1                                  |
| 8572  | PDLIM4   | PDZ and LIM domain 4                                                   |
| 8633  | UNC5C    | unc-5 netrin receptor C                                                |
| 8659  | ALDH4A1  | aldehyde dehydrogenase 4 family member A1                              |
| 8728  | ADAM19   | ADAM metallopeptidase domain 19                                        |
| 8927  | BSN      | bassoon presynaptic cytomatrix protein                                 |
| 8941  | CDK5R2   | cyclin-dependent kinase 5, regulatory subunit 2 (p39)                  |
| 9028  | RHBDL1   | rhomboid, veinlet-like 1 (Drosophila)                                  |
| 9132  | KCNQ4    | potassium channel, voltage gated KQT-like subfamily Q, member 4        |
| 9138  | ARHGEF1  | Rho guanine nucleotide exchange factor 1                               |
| 9253  | NUMBL    | numb homolog (Drosophila)-like                                         |
| 9254  | CACNA2D2 | calcium channel, voltage-dependent, alpha 2/delta subunit 2            |
| 9381  | OTOF     | otoferlin                                                              |
| 9415  | FADS2    | fatty acid desaturase 2                                                |
| 9421  | HAND1    | heart and neural crest derivatives expressed 1                         |
| 9453  | GGPS1    | geranylgeranyl diphosphate synthase 1                                  |
| 9468  | PCYT1B   | phosphate cytidyltransferase 1, choline, beta                          |
| 9472  | AKAP6    | A-kinase anchoring protein 6                                           |
| 9480  | ONECUT2  | one cut homeobox 2                                                     |
| 9520  | NPEPPS   | aminopeptidase puromycin sensitive                                     |
| 9628  | RGS6     | regulator of G-protein signaling 6                                     |
| 9644  | SH3PXD2A | SH3 and PX domains 2A                                                  |
| 9651  | PLCH2    | phospholipase C eta 2                                                  |
| 9658  | ZNF516   | zinc finger protein 516                                                |
| 9670  | IPO13    | importin 13                                                            |
| 9761  | MLEC     | malectin                                                               |
| 9776  | ATG13    | autophagy related 13                                                   |
| 9777  | TM9SF4   | transmembrane 9 superfamily protein member 4                           |
| 9905  | SGSM2    | small G protein signaling modulator 2                                  |
| 9938  | ARHGAP25 | Rho GTPase activating protein 25                                       |
| 9942  | XYLB     | xylulokinase homolog (H. influenzae)                                   |
| 9967  | THRAP3   | thyroid hormone receptor associated protein 3                          |
| 10090 | UST      | uronyl-2-sulfotransferase                                              |
| 10096 | ACTR3    | ARP3 actin-related protein 3 homolog (yeast)                           |
| 10174 | SORBS3   | sorbin and SH3 domain containing 3                                     |
| 10211 | FLOT1    | flotillin 1                                                            |
| 10232 | MSLN     | mesothelin                                                             |
| 10297 | APC2     | adenomatosis polyposis coli 2                                          |

|       |          |                                                                           |
|-------|----------|---------------------------------------------------------------------------|
| 10298 | PAK4     | p21 protein (Cdc42/Rac)-activated kinase 4                                |
| 10311 | DSCR3    | Down syndrome critical region 3                                           |
| 10362 | HMG20B   | high mobility group 20B                                                   |
| 10391 | CORO2B   | coronin, actin binding protein, 2B                                        |
| 10397 | NDRG1    | N-myc downstream regulated 1                                              |
| 10454 | TAB1     | TGF-beta activated kinase 1/MAP3K7 binding protein 1                      |
| 10481 | HOXB13   | homeobox B13                                                              |
| 10494 | STK25    | serine/threonine kinase 25                                                |
| 10498 | CARM1    | coactivator associated arginine methyltransferase 1                       |
| 10525 | HYOU1    | hypoxia up-regulated 1                                                    |
| 10562 | OLFM4    | olfactomedin 4                                                            |
| 10645 | CAMKK2   | calcium/calmodulin-dependent protein kinase kinase 2, beta                |
| 10715 | CERS1    | ceramide synthase 1                                                       |
| 10725 | NFAT5    | nuclear factor of activated T-cells 5, tonicity-responsive                |
| 10743 | RAI1     | retinoic acid induced 1                                                   |
| 10766 | TOB2     | transducer of ERBB2, 2                                                    |
| 10771 | ZMYND11  | zinc finger, MYND-type containing 11                                      |
| 10788 | IQGAP2   | IQ motif containing GTPase activating protein 2                           |
| 10814 | CPLX2    | complexin 2                                                               |
| 10815 | CPLX1    | complexin 1                                                               |
| 10867 | TSPAN9   | tetraspanin 9                                                             |
| 10893 | MMP24    | matrix metalloproteinase 24 (membrane-inserted)                           |
| 10945 | KDEL1    | KDEL (Lys-Asp-Glu-Leu) endoplasmic reticulum protein retention receptor 1 |
| 11135 | CDC42EP1 | CDC42 effector protein (Rho GTPase binding) 1                             |
| 11155 | LDB3     | LIM domain binding 3                                                      |
| 11170 | FAM107A  | family with sequence similarity 107 member A                              |
| 11176 | BAZ2A    | bromodomain adjacent to zinc finger domain 2A                             |
| 11240 | PADI2    | peptidyl arginine deiminase, type II                                      |
| 11248 | NXPH3    | neurexophilin 3                                                           |
| 11261 | CHP1     | calcineurin-like EF-hand protein 1                                        |
| 11273 | ATXN2L   | ataxin 2-like                                                             |
| 22801 | ITGA11   | integrin alpha 11                                                         |
| 22826 | DNAJC8   | DnaJ heat shock protein family (Hsp40) member C8                          |
| 22888 | UBOX5    | U-box domain containing 5                                                 |
| 22931 | RAB18    | RAB18, member RAS oncogene family                                         |
| 22936 | ELL2     | elongation factor, RNA polymerase II, 2                                   |
| 22953 | P2RX2    | purinergic receptor P2X, ligand gated ion channel, 2                      |
| 22992 | KDM2A    | lysine (K)-specific demethylase 2A                                        |
| 22993 | HMGXB3   | HMG box domain containing 3                                               |
| 23034 | SAMD4A   | sterile alpha motif domain containing 4A                                  |
| 23038 | WDTC1    | WD and tetratricopeptide repeats 1                                        |
| 23046 | KIF21B   | kinesin family member 21B                                                 |



|       |           |                                                                    |
|-------|-----------|--------------------------------------------------------------------|
| 23090 | ZNF423    | zinc finger protein 423                                            |
| 23096 | IQSEC2    | IQ motif and Sec7 domain 2                                         |
| 23109 | DDN       | dendrin                                                            |
| 23119 | HIC2      | hypermethylated in cancer 2                                        |
| 23126 | POGZ      | pogo transposable element with ZNF domain                          |
| 23211 | ZC3H4     | zinc finger CCCH-type containing 4                                 |
| 23217 | ZFR2      | zinc finger RNA binding protein 2                                  |
| 23247 | KIAA0556  | KIAA0556                                                           |
| 23251 | KIAA1024  | KIAA1024                                                           |
| 23264 | ZC3H7B    | zinc finger CCCH-type containing 7B                                |
| 23270 | TSPYL4    | TSPY-like 4                                                        |
| 23276 | KLHL18    | kelch like family member 18                                        |
| 23293 | SMG6      | SMG6 nonsense mediated mRNA decay factor                           |
| 23322 | RPGRIP1L  | RPGRIP1-like                                                       |
| 23334 | SZT2      | seizure threshold 2 homolog (mouse)                                |
| 23373 | CRTC1     | CREB regulated transcription coactivator 1                         |
| 23380 | SRGAP2    | SLIT-ROBO Rho GTPase activating protein 2                          |
| 23403 | FBXO46    | F-box protein 46                                                   |
| 23466 | CBX6      | chromobox 6                                                        |
| 23468 | CBX5      | chromobox 5                                                        |
| 23476 | BRD4      | bromodomain containing 4                                           |
| 23500 | DAAM2     | dishevelled associated activator of morphogenesis 2                |
| 23598 | PATZ1     | POZ (BTB) and AT hook containing zinc finger 1                     |
| 25758 | KIAA1549L | KIAA1549-like                                                      |
| 25789 | TMEM59L   | transmembrane protein 59 like                                      |
| 25840 | METTL7A   | methyltransferase like 7A                                          |
| 25946 | ZNF385A   | zinc finger protein 385A                                           |
| 25970 | SH2B1     | SH2B adaptor protein 1                                             |
| 26000 | TBC1D10B  | TBC1 domain family member 10B                                      |
| 26011 | TENM4     | teneurin transmembrane protein 4                                   |
| 26034 | IPCEF1    | interaction protein for cytohesin exchange factors 1               |
| 26051 | PPP1R16B  | protein phosphatase 1 regulatory subunit 16B                       |
| 26099 | SZRD1     | SUZ RNA binding domain containing 1                                |
| 26145 | IRF2BP1   | interferon regulatory factor 2 binding protein 1                   |
| 26468 | LHX6      | LIM homeobox 6                                                     |
| 26469 | PTPN18    | protein tyrosine phosphatase, non-receptor type 18 (brain-derived) |
| 26507 | CNNM1     | cyclin and CBS domain divalent metal cation transport mediator 1   |
| 26523 | AGO1      | argonaute RISC catalytic component 1                               |
| 27112 | FAM155B   | family with sequence similarity 155 member B                       |
| 27128 | CYTH4     | cytohesin 4                                                        |
| 27315 | PGAP2     | post-GPI attachment to proteins 2                                  |
| 27351 | DESI1     | desumoylating isopeptidase 1                                       |
| 27433 | TOR2A     | torsin family 2, member A                                          |

|       |          |                                                                    |
|-------|----------|--------------------------------------------------------------------|
| 27434 | POLM     | polymerase (DNA directed), mu                                      |
| 28511 | NKIRAS2  | NFKB inhibitor interacting Ras-like 2                              |
| 28964 | GIT1     | G protein-coupled receptor kinase interacting ArfGAP 1             |
| 28974 | C19orf53 | chromosome 19 open reading frame 53                                |
| 29115 | SAP30BP  | SAP30 binding protein                                              |
| 29780 | PARVB    | parvin beta                                                        |
| 29924 | EPN1     | epsin 1                                                            |
| 50488 | MINK1    | misshapen-like kinase 1                                            |
| 51043 | ZBTB7B   | zinc finger and BTB domain containing 7B                           |
| 51082 | POLR1D   | polymerase (RNA) I polypeptide D                                   |
| 51108 | METTL9   | methyltransferase like 9                                           |
| 51341 | ZBTB7A   | zinc finger and BTB domain containing 7A                           |
| 51441 | YTHDF2   | YTH N(6)-methyladenosine RNA binding protein 2                     |
| 51564 | HDAC7    | histone deacetylase 7                                              |
| 51592 | TRIM33   | tripartite motif containing 33                                     |
| 51629 | SLC25A39 | solute carrier family 25, member 39                                |
| 51725 | FBXO40   | F-box protein 40                                                   |
| 51752 | ERAP1    | endoplasmic reticulum aminopeptidase 1                             |
| 53405 | CLIC5    | chloride intracellular channel 5                                   |
| 53834 | FGFRL1   | fibroblast growth factor receptor-like 1                           |
| 53944 | CSNK1G1  | casein kinase 1, gamma 1                                           |
| 54331 | GNG2     | guanine nucleotide binding protein (G protein), gamma 2            |
| 54509 | RHOF     | ras homolog family member F (in filopodia)                         |
| 54741 | LEPROT   | leptin receptor overlapping transcript                             |
| 54788 | DNAJB12  | DnaJ heat shock protein family (Hsp40) member B12                  |
| 54868 | TMEM104  | transmembrane protein 104                                          |
| 54957 | TXNL4B   | thioredoxin-like 4B                                                |
| 54976 | C20orf27 | chromosome 20 open reading frame 27                                |
| 55036 | CCDC40   | coiled-coil domain containing 40                                   |
| 55065 | SLC52A1  | solute carrier family 52 (riboflavin transporter), member 1        |
| 55095 | SAMD4B   | sterile alpha motif domain containing 4B                           |
| 55176 | SEC61A2  | Sec61 translocon alpha 2 subunit                                   |
| 55224 | ETNK2    | ethanolamine kinase 2                                              |
| 55243 | KIRREL   | kin of IRRE like (Drosophila)                                      |
| 55295 | KLHL26   | kelch like family member 26                                        |
| 55322 | C5orf22  | chromosome 5 open reading frame 22                                 |
| 55362 | TMEM63B  | transmembrane protein 63B                                          |
| 55577 | NAGK     | N-acetylglucosamine kinase                                         |
| 55603 | FAM46A   | family with sequence similarity 46 member A                        |
| 55604 | LRRC16A  | leucine rich repeat containing 16A                                 |
| 55640 | FLVCR2   | feline leukemia virus subgroup C cellular receptor family member 2 |
| 55652 | SLC48A1  | solute carrier family 48 (heme transporter), member 1              |
| 55690 | PACS1    | phosphofurin acidic cluster sorting protein 1                      |

|       |          |                                                                                                                  |
|-------|----------|------------------------------------------------------------------------------------------------------------------|
| 55793 | FAM63A   | family with sequence similarity 63 member A                                                                      |
| 55810 | FOXJ2    | forkhead box J2                                                                                                  |
| 55920 | RCC2     | regulator of chromosome condensation 2                                                                           |
| 56000 | NXF3     | nuclear RNA export factor 3                                                                                      |
| 56413 | LTB4R2   | leukotriene B4 receptor 2                                                                                        |
| 56834 | GPR137   | G protein-coupled receptor 137                                                                                   |
| 56852 | RAD18    | RAD18 E3 ubiquitin protein ligase                                                                                |
| 56965 | PARP6    | poly(ADP-ribose) polymerase family member 6                                                                      |
| 56970 | ATXN7L3  | ataxin 7-like 3                                                                                                  |
| 57026 | PDXP     | pyridoxal (pyridoxine, vitamin B6) phosphatase                                                                   |
| 57111 | RAB25    | RAB25, member RAS oncogene family                                                                                |
| 57154 | SMURF1   | SMAD specific E3 ubiquitin protein ligase 1                                                                      |
| 57217 | TTC7A    | tetratricopeptide repeat domain 7A                                                                               |
| 57449 | PLEKHG5  | pleckstrin homology and RhoGEF domain containing G5                                                              |
| 57452 | GALNT16  | polypeptide N-acetylgalactosaminyltransferase 16                                                                 |
| 57453 | DSCAML1  | Down syndrome cell adhesion molecule like 1                                                                      |
| 57458 | TMCC3    | transmembrane and coiled-coil domain family 3                                                                    |
| 57473 | ZNF512B  | zinc finger protein 512B                                                                                         |
| 57605 | PITPNM2  | phosphatidylinositol transfer protein, membrane associated 2                                                     |
| 57608 | KIAA1462 | KIAA1462                                                                                                         |
| 57611 | ISLR2    | immunoglobulin superfamily containing leucine-rich repeat 2                                                      |
| 57715 | SEMA4G   | sema domain, immunoglobulin domain (Ig), transmembrane domain (TM) and short cytoplasmic domain, (semaphorin) 4G |
| 57834 | CYP4F11  | cytochrome P450, family 4, subfamily F, polypeptide 11                                                           |
| 57863 | CADM3    | cell adhesion molecule 3                                                                                         |
| 58526 | MID1IP1  | MID1 interacting protein 1                                                                                       |
| 59269 | HIVEP3   | human immunodeficiency virus type I enhancer binding protein 3                                                   |
| 59274 | MESDC1   | mesoderm development candidate 1                                                                                 |
| 60677 | CELF6    | CUGBP, Elav-like family member 6                                                                                 |
| 63910 | SLC17A9  | solute carrier family 17 (vesicular nucleotide transporter), member 9                                            |
| 63974 | NEUROD6  | neuronal differentiation 6                                                                                       |
| 64067 | NPAS3    | neuronal PAS domain protein 3                                                                                    |
| 64129 | TINAGL1  | tubulointerstitial nephritis antigen-like 1                                                                      |
| 64137 | ABCG4    | ATP binding cassette subfamily G member 4                                                                        |
| 64599 | GIGYF1   | GRB10 interacting GYF protein 1                                                                                  |
| 64689 | GORASP1  | golgi reassembly stacking protein 1                                                                              |
| 64834 | ELOVL1   | ELOVL fatty acid elongase 1                                                                                      |
| 65078 | RTN4R    | reticulon 4 receptor                                                                                             |
| 79016 | DDA1     | DET1 and DDB1 associated 1                                                                                       |
| 79033 | ERI3     | ERI1 exoribonuclease family member 3                                                                             |
| 79065 | ATG9A    | autophagy related 9A                                                                                             |
| 79152 | FA2H     | fatty acid 2-hydroxylase                                                                                         |
| 79178 | THTPA    | thiamine triphosphatase                                                                                          |

|       |          |                                                                        |
|-------|----------|------------------------------------------------------------------------|
| 79365 | BHLHE41  | basic helix-loop-helix family member e41                               |
| 79712 | GTDC1    | glycosyltransferase like domain containing 1                           |
| 79751 | SLC25A22 | solute carrier family 25 (mitochondrial carrier: glutamate), member 22 |
| 79789 | CLMN     | calmin (calponin-like, transmembrane)                                  |
| 79837 | PIP4K2C  | phosphatidylinositol-5-phosphate 4-kinase, type II, gamma              |
| 79875 | THSD4    | thrombospondin type 1 domain containing 4                              |
| 79991 | OBFC1    | oligonucleotide/oligosaccharide-binding fold containing 1              |
| 80162 | ATHL1    | ATH1, acid trehalase-like 1 (yeast)                                    |
| 80320 | SP6      | Sp6 transcription factor                                               |
| 80725 | SRCIN1   | SRC kinase signaling inhibitor 1                                       |
| 80774 | LIMD2    | LIM domain containing 2                                                |
| 80790 | CMIP     | c-Maf inducing protein                                                 |
| 81619 | TSPAN14  | tetraspanin 14                                                         |
| 81848 | SPRY4    | sprouty RTK signaling antagonist 4                                     |
| 83394 | PITPNM3  | PITPNM family member 3                                                 |
| 83637 | ZMIZ2    | zinc finger, MIZ-type containing 2                                     |
| 83714 | NRIP2    | nuclear receptor interacting protein 2                                 |
| 83716 | CRISPLD2 | cysteine-rich secretory protein LCCL domain containing 2               |
| 84329 | HVCN1    | hydrogen voltage gated channel 1                                       |
| 84447 | SYVN1    | synoviolin 1                                                           |
| 84530 | SRRM4    | serine/arginine repetitive matrix 4                                    |
| 84630 | TTBK1    | tau tubulin kinase 1                                                   |
| 84649 | DGAT2    | diacylglycerol O-acyltransferase 2                                     |
| 84687 | PPP1R9B  | protein phosphatase 1 regulatory subunit 9B                            |
| 84726 | PRRC2B   | proline-rich coiled-coil 2B                                            |
| 84929 | FIBCD1   | fibrinogen C domain containing 1                                       |
| 85352 | KIAA1644 | KIAA1644                                                               |
| 85414 | SLC45A3  | solute carrier family 45, member 3                                     |
| 85446 | ZFHX2    | zinc finger homeobox 2                                                 |
| 89790 | SIGLEC10 | sialic acid binding Ig-like lectin 10                                  |
| 89797 | NAV2     | neuron navigator 2                                                     |
| 89848 | FCHSD1   | FCH and double SH3 domains 1                                           |
| 89853 | MVB12B   | multivesicular body subunit 12B                                        |
| 90121 | TSR2     | TSR2, 20S rRNA accumulation, homolog ( <i>S. cerevisiae</i> )          |
| 90139 | TSPAN18  | tetraspanin 18                                                         |
| 90362 | FAM110B  | family with sequence similarity 110 member B                           |
| 90407 | TMEM41A  | transmembrane protein 41A                                              |
| 90933 | TRIM41   | tripartite motif containing 41                                         |
| 90993 | CREB3L1  | cAMP responsive element binding protein 3-like 1                       |
| 91608 | RASL10B  | RAS-like, family 10, member B                                          |
| 91748 | ELMSAN1  | ELM2 and Myb/SANT-like domain containing 1                             |
| 92154 | MTSS1L   | metastasis suppressor 1-like                                           |
| 92558 | CCDC64   | coiled-coil domain containing 64                                       |

|        |          |                                                                               |
|--------|----------|-------------------------------------------------------------------------------|
| 92736  | OTOP2    | otopetrin 2                                                                   |
| 92949  | ADAMTSL1 | ADAMTS like 1                                                                 |
| 93145  | OLFM2    | olfactomedin 2                                                                |
| 93380  | MMGT1    | membrane magnesium transporter 1                                              |
| 93517  | SDR42E1  | short chain dehydrogenase/reductase family 42E, member 1                      |
| 112939 | NACC1    | nucleus accumbens associated 1, BEN and BTB (POZ) domain containing           |
| 113189 | CHST14   | carbohydrate (N-acetylgalactosamine 4-0) sulfotransferase 14                  |
| 113829 | SLC35A4  | solute carrier family 35, member A4                                           |
| 114787 | GPRIN1   | G protein regulated inducer of neurite outgrowth 1                            |
| 114881 | OSBPL7   | oxysterol binding protein like 7                                              |
| 114897 | C1QTNF1  | C1q and tumor necrosis factor related protein 1                               |
| 115572 | FAM46B   | family with sequence similarity 46 member B                                   |
| 116113 | FOXP4    | forkhead box P4                                                               |
| 116983 | ACAP3    | ArfGAP with coiled-coil, ankyrin repeat and PH domains 3                      |
| 117581 | TWIST2   | twist family bHLH transcription factor 2                                      |
| 121512 | FGD4     | FYVE, RhoGEF and PH domain containing 4                                       |
| 124460 | SNX20    | sorting nexin 20                                                              |
| 124583 | CANT1    | calcium activated nucleotidase 1                                              |
| 124590 | USH1G    | Usher syndrome 1G (autosomal recessive)                                       |
| 124857 | WFIKKN2  | WAP, follistatin/kazal, immunoglobulin, kunitz and netrin domain containing 2 |
| 124930 | ANKRD13B | ankyrin repeat domain 13B                                                     |
| 124935 | SLC43A2  | solute carrier family 43 (amino acid system L transporter), member 2          |
| 124976 | SPNS2    | spinster homolog 2 (Drosophila)                                               |
| 125058 | TBC1D16  | TBC1 domain family, member 16                                                 |
| 125950 | RAVER1   | ribonucleoprotein, PTB-binding 1                                              |
| 126014 | OSCAR    | osteoclast associated, immunoglobulin-like receptor                           |
| 126393 | HSPB6    | heat shock protein family B (small) member 6                                  |
| 126410 | CYP4F22  | cytochrome P450, family 4, subfamily F, polypeptide 22                        |
| 126549 | ANKLE1   | ankyrin repeat and LEM domain containing 1                                    |
| 128434 | VSTM2L   | V-set and transmembrane domain containing 2 like                              |
| 132228 | LSMEM2   | leucine-rich single-pass membrane protein 2                                   |
| 134266 | GRPEL2   | GrpE-like 2, mitochondrial (E. coli)                                          |
| 134288 | TMEM174  | transmembrane protein 174                                                     |
| 135656 | DPCR1    | diffuse panbronchiolitis critical region 1                                    |
| 138162 | C9orf116 | chromosome 9 open reading frame 116                                           |
| 140885 | SIRPA    | signal-regulatory protein alpha                                               |
| 145270 | PRIMA1   | proline rich membrane anchor 1                                                |
| 145567 | TTC7B    | tetratricopeptide repeat domain 7B                                            |
| 146691 | TOM1L2   | target of myb1 like 2 membrane trafficking protein                            |
| 147339 | C18orf25 | chromosome 18 open reading frame 25                                           |
| 148789 | B3GALNT2 | beta-1,3-N-acetylgalactosaminyltransferase 2                                  |

|        |          |                                                                      |
|--------|----------|----------------------------------------------------------------------|
| 150372 | NFAM1    | NFAT activating protein with ITAM motif 1                            |
| 158471 | PRUNE2   | prune homolog 2 (Drosophila)                                         |
| 162466 | PHOSPHO1 | phosphatase, orphan 1                                                |
| 162494 | RHBDL3   | rhomboid, veinlet-like 3 (Drosophila)                                |
| 162514 | TRPV3    | transient receptor potential cation channel, subfamily V, member 3   |
| 164633 | CABP7    | calcium binding protein 7                                            |
| 167826 | OLIG3    | oligodendrocyte transcription factor 3                               |
| 170575 | GIMAP1   | GTPase, IMAP family member 1                                         |
| 171017 | ZNF384   | zinc finger protein 384                                              |
| 196527 | ANO6     | anoctamin 6                                                          |
| 199870 | FAM76A   | family with sequence similarity 76 member A                          |
| 199964 | TMEM61   | transmembrane protein 61                                             |
| 201514 | ZNF584   | zinc finger protein 584                                              |
| 203259 | FAM219A  | family with sequence similarity 219 member A                         |
| 219654 | ZCCHC24  | zinc finger, CCHC domain containing 24                               |
| 219699 | UNC5B    | unc-5 netrin receptor B                                              |
| 219855 | SLC37A2  | solute carrier family 37 (glucose-6-phosphate transporter), member 2 |
| 219995 | MS4A15   | membrane-spanning 4-domains, subfamily A, member 15                  |
| 220074 | LRTOMT   | leucine rich transmembrane and O-methyltransferase domain containing |
| 221687 | RNF182   | ring finger protein 182                                              |
| 221935 | SDK1     | sidekick cell adhesion molecule 1                                    |
| 222865 | TMEM130  | transmembrane protein 130                                            |
| 246330 | PELI3    | pellino E3 ubiquitin protein ligase family member 3                  |
| 253461 | ZBTB38   | zinc finger and BTB domain containing 38                             |
| 254263 | CNIH2    | cornichon family AMPA receptor auxiliary protein 2                   |
| 254428 | SLC41A1  | solute carrier family 41 (magnesium transporter), member 1           |
| 266727 | MDGA1    | MAM domain containing glycosylphosphatidylinositol anchor 1          |
| 266743 | NPAS4    | neuronal PAS domain protein 4                                        |
| 283337 | ZNF740   | zinc finger protein 740                                              |
| 283455 | KSR2     | kinase suppressor of ras 2                                           |
| 283638 | CEP170B  | centrosomal protein 170B                                             |
| 284106 | CISD3    | CDGSH iron sulfur domain 3                                           |
| 284340 | CXCL17   | chemokine (C-X-C motif) ligand 17                                    |
| 284613 | CYB561D1 | cytochrome b561 family member D1                                     |
| 285590 | SH3PXD2B | SH3 and PX domains 2B                                                |
| 286336 | FAM78A   | family with sequence similarity 78 member A                          |
| 338324 | S100A7A  | S100 calcium binding protein A7A                                     |
| 338917 | VSX2     | visual system homeobox 2                                             |
| 339122 | RAB43    | RAB43, member RAS oncogene family                                    |
| 340061 | TMEM173  | transmembrane protein 173                                            |
| 342933 | ZSCAN5B  | zinc finger and SCAN domain containing 5B                            |
| 347365 | ITIH6    | inter-alpha-trypsin inhibitor heavy chain family member 6            |

|        |          |                                                                        |
|--------|----------|------------------------------------------------------------------------|
| 374655 | ZNF710   | zinc finger protein 710                                                |
| 375057 | C1orf95  | chromosome 1 open reading frame 95                                     |
| 375790 | AGRN     | agrin                                                                  |
| 387509 | GPR153   | G protein-coupled receptor 153                                         |
| 388115 | C15orf52 | chromosome 15 open reading frame 52                                    |
| 388336 | SHISA6   | shisa family member 6                                                  |
| 388969 | C2orf68  | chromosome 2 open reading frame 68                                     |
| 399687 | MYO18A   | myosin XVIII A                                                         |
| 399947 | C11orf87 | chromosome 11 open reading frame 87                                    |
| 399979 | SNX19    | sorting nexin 19                                                       |
| 402665 | IGLON5   | IgLON family member 5                                                  |
| 404037 | HAPLN4   | hyaluronan and proteoglycan link protein 4                             |
| 441631 | TSPAN11  | tetraspanin 11                                                         |
| 642938 | FAM196A  | family with sequence similarity 196 member A                           |
| 643866 | CBLN3    | cerebellin 3 precursor                                                 |
| 643988 | C1orf233 | chromosome 1 open reading frame 233                                    |
| 644150 | WIPF3    | WAS/WASL interacting protein family member 3                           |
| 653509 | SFTPA1   | surfactant protein A1                                                  |
| 654790 | PCP4L1   | Purkinje cell protein 4 like 1                                         |
| 9762   | LZTS3    | leucine zipper, putative tumor suppressor family member 3              |
| 23630  | KCNE5    | potassium channel, voltage gated subfamily E regulatory beta subunit 5 |
| 123591 | TMEM266  | transmembrane protein 266                                              |

Supplementary table 4: A list of KEGG pathways of predicted and validated target genes of hsa-miR-608

| Term                                      | Count | PValue   |
|-------------------------------------------|-------|----------|
| hsa04810:Regulation of actin cytoskeleton | 18    | 4.96E-04 |
| hsa04722:Neurotrophin signaling pathway   | 13    | 5.87E-04 |
| hsa05220:Chronic myeloid leukemia         | 10    | 6.12E-04 |
| hsa05200:Pathways in cancer               | 23    | 7.44E-04 |
| hsa04144:Endocytosis                      | 16    | 7.81E-04 |
| hsa04360:Axon guidance                    | 13    | 8.38E-04 |
| hsa05210:Colorectal cancer                | 10    | 1.40E-03 |
| hsa04010:MAPK signaling pathway           | 19    | 2.18E-03 |
| hsa04510:Focal adhesion                   | 15    | 5.07E-03 |
| hsa04720:Long-term potentiation           | 8     | 5.92E-03 |
| hsa04012:ErbB signaling pathway           | 9     | 6.62E-03 |
| hsa05212:Pancreatic cancer                | 8     | 8.08E-03 |
| hsa04370:VEGF signaling pathway           | 8     | 1.00E-02 |
| hsa04020:Calcium signaling pathway        | 13    | 1.09E-02 |
| hsa04666:Fc gamma R-mediated phagocytosis | 9     | 1.11E-02 |
| hsa05214:Glioma                           | 7     | 1.53E-02 |

|                                               |    |          |
|-----------------------------------------------|----|----------|
| hsa00564:Glycerophospholipid metabolism       | 7  | 2.16E-02 |
| hsa04310:Wnt signaling pathway                | 11 | 2.33E-02 |
| hsa05211:Renal cell carcinoma                 | 7  | 2.46E-02 |
| hsa04630:Jak-STAT signaling pathway           | 11 | 2.73E-02 |
| hsa05110:Vibrio cholerae infection            | 6  | 3.34E-02 |
| hsa04670:Leukocyte transendothelial migration | 9  | 3.59E-02 |
| hsa04520:Adherens junction                    | 7  | 3.70E-02 |
| hsa04912:GnRH signaling pathway               | 8  | 3.80E-02 |
| hsa04062:Chemokine signaling pathway          | 12 | 3.82E-02 |

Supplementary table 5: A list of Gene Ontology (GO) of predicted and validated target genes of hsa-miR-608

| Category      | Term                                                                                                    | Count | PValue   |
|---------------|---------------------------------------------------------------------------------------------------------|-------|----------|
| GOTERM_BP_FAT | GO:0009891~positive regulation of biosynthetic process                                                  | 51    | 1.26E-07 |
| GOTERM_BP_FAT | GO:0010557~positive regulation of macromolecule biosynthetic process                                    | 49    | 1.27E-07 |
| GOTERM_BP_FAT | GO:0010628~positive regulation of gene expression                                                       | 45    | 1.85E-07 |
| GOTERM_BP_FAT | GO:0031328~positive regulation of cellular biosynthetic process                                         | 50    | 2.02E-07 |
| GOTERM_BP_FAT | GO:0045941~positive regulation of transcription                                                         | 44    | 2.13E-07 |
| GOTERM_BP_FAT | GO:0051173~positive regulation of nitrogen compound metabolic process                                   | 47    | 5.15E-07 |
| GOTERM_BP_FAT | GO:0045893~positive regulation of transcription, DNA-dependent                                          | 38    | 1.04E-06 |
| GOTERM_BP_FAT | GO:0051254~positive regulation of RNA metabolic process                                                 | 38    | 1.29E-06 |
| GOTERM_BP_FAT | GO:0045935~positive regulation of nucleobase, nucleoside, nucleotide and nucleic acid metabolic process | 45    | 1.31E-06 |
| GOTERM_BP_FAT | GO:0006357~regulation of transcription from RNA polymerase II promoter                                  | 49    | 2.69E-06 |
| GOTERM_BP_FAT | GO:0030182~neuron differentiation                                                                       | 35    | 2.81E-06 |
| GOTERM_BP_FAT | GO:0030030~cell projection organization                                                                 | 31    | 4.16E-06 |
| GOTERM_BP_FAT | GO:0010604~positive regulation of macromolecule metabolic process                                       | 54    | 5.50E-06 |
| GOTERM_BP_FAT | GO:0048666~neuron development                                                                           | 28    | 1.93E-05 |
| GOTERM_BP_FAT | GO:0045449~regulation of transcription                                                                  | 121   | 2.69E-05 |
| GOTERM_BP_FAT | GO:0045944~positive regulation of transcription from RNA polymerase II promoter                         | 29    | 3.59E-05 |
| GOTERM_BP_FAT | GO:0051252~regulation of RNA metabolic process                                                          | 90    | 4.49E-05 |



|               |                                                                                 |    |          |
|---------------|---------------------------------------------------------------------------------|----|----------|
| GOTERM_BP_FAT | GO:0006355~regulation of transcription, DNA-dependent                           | 88 | 5.73E-05 |
| GOTERM_BP_FAT | GO:0031175~neuron projection development                                        | 21 | 2.96E-04 |
| GOTERM_BP_FAT | GO:0048598~embryonic morphogenesis                                              | 23 | 5.00E-04 |
| GOTERM_BP_FAT | GO:0007423~sensory organ development                                            | 19 | 5.46E-04 |
| GOTERM_BP_FAT | GO:0007242~intracellular signaling cascade                                      | 63 | 6.67E-04 |
| GOTERM_BP_FAT | GO:0032990~cell part morphogenesis                                              | 20 | 7.81E-04 |
| GOTERM_BP_FAT | GO:0006350~transcription                                                        | 94 | 1.13E-03 |
| GOTERM_BP_FAT | GO:0007169~transmembrane receptor protein tyrosine kinase signaling pathway     | 18 | 1.14E-03 |
| GOTERM_BP_FAT | GO:0050773~regulation of dendrite development                                   | 5  | 1.16E-03 |
| GOTERM_BP_FAT | GO:0043009~chordate embryonic development                                       | 23 | 1.34E-03 |
| GOTERM_BP_FAT | GO:0048667~cell morphogenesis involved in neuron differentiation                | 17 | 1.44E-03 |
| GOTERM_BP_FAT | GO:0009792~embryonic development ending in birth or egg hatching                | 23 | 1.50E-03 |
| GOTERM_BP_FAT | GO:0046578~regulation of Ras protein signal transduction                        | 17 | 1.53E-03 |
| GOTERM_BP_FAT | GO:0001944~vasculature development                                              | 19 | 1.57E-03 |
| GOTERM_BP_FAT | GO:0001889~liver development                                                    | 8  | 1.61E-03 |
| GOTERM_BP_FAT | GO:0030856~regulation of epithelial cell differentiation                        | 6  | 2.28E-03 |
| GOTERM_BP_FAT | GO:0042490~mechanoreceptor differentiation                                      | 6  | 2.28E-03 |
| GOTERM_BP_FAT | GO:0060541~respiratory system development                                       | 11 | 2.84E-03 |
| GOTERM_BP_FAT | GO:0001775~cell activation                                                      | 20 | 2.92E-03 |
| GOTERM_BP_FAT | GO:0032989~cellular component morphogenesis                                     | 25 | 2.92E-03 |
| GOTERM_BP_FAT | GO:0001568~blood vessel development                                             | 18 | 2.95E-03 |
| GOTERM_BP_FAT | GO:0048858~cell projection morphogenesis                                        | 18 | 2.95E-03 |
| GOTERM_BP_FAT | GO:0070141~response to UV-A                                                     | 3  | 3.14E-03 |
| GOTERM_BP_FAT | GO:0010551~regulation of specific transcription from RNA polymerase II promoter | 10 | 3.63E-03 |
| GOTERM_BP_FAT | GO:0002521~leukocyte differentiation                                            | 12 | 3.83E-03 |
| GOTERM_BP_FAT | GO:0051056~regulation of small GTPase mediated signal transduction              | 18 | 3.93E-03 |
| GOTERM_BP_FAT | GO:0048568~embryonic organ development                                          | 14 | 4.35E-03 |
| GOTERM_BP_FAT | GO:0048546~digestive tract morphogenesis                                        | 5  | 4.36E-03 |
| GOTERM_BP_FAT | GO:0055123~digestive system development                                         | 5  | 4.36E-03 |
| GOTERM_BP_FAT | GO:0048812~neuron projection morphogenesis                                      | 16 | 4.43E-03 |
| GOTERM_BP_FAT | GO:0007167~enzyme linked receptor protein signaling pathway                     | 22 | 4.44E-03 |
| GOTERM_BP_FAT | GO:0001503~ossification                                                         | 11 | 4.46E-03 |
| GOTERM_BP_FAT | GO:0032583~regulation of gene-specific transcription                            | 12 | 4.55E-03 |

|               |                                                                 |    |          |
|---------------|-----------------------------------------------------------------|----|----------|
| GOTERM_BP_FAT | GO:0031668~cellular response to extracellular stimulus          | 8  | 4.78E-03 |
| GOTERM_BP_FAT | GO:0030324~lung development                                     | 10 | 5.12E-03 |
| GOTERM_BP_FAT | GO:0007243~protein kinase cascade                               | 23 | 5.22E-03 |
| GOTERM_BP_FAT | GO:0021700~developmental maturation                             | 10 | 5.83E-03 |
| GOTERM_BP_FAT | GO:0035295~tube development                                     | 16 | 5.95E-03 |
| GOTERM_BP_FAT | GO:0045321~leukocyte activation                                 | 17 | 6.13E-03 |
| GOTERM_BP_FAT | GO:0030323~respiratory tube development                         | 10 | 6.22E-03 |
| GOTERM_BP_FAT | GO:0043066~negative regulation of apoptosis                     | 22 | 6.32E-03 |
| GOTERM_BP_FAT | GO:0046777~protein amino acid autophosphorylation               | 9  | 6.61E-03 |
| GOTERM_BP_FAT | GO:0030098~lymphocyte differentiation                           | 10 | 6.62E-03 |
| GOTERM_BP_FAT | GO:0000904~cell morphogenesis involved in differentiation       | 17 | 6.64E-03 |
| GOTERM_BP_FAT | GO:0009895~negative regulation of catabolic process             | 6  | 6.76E-03 |
| GOTERM_BP_FAT | GO:0000902~cell morphogenesis                                   | 22 | 6.85E-03 |
| GOTERM_BP_FAT | GO:0060348~bone development                                     | 11 | 7.14E-03 |
| GOTERM_BP_FAT | GO:0060113~inner ear receptor cell differentiation              | 5  | 7.16E-03 |
| GOTERM_BP_FAT | GO:0048592~eye morphogenesis                                    | 8  | 7.23E-03 |
| GOTERM_BP_FAT | GO:0043069~negative regulation of programmed cell death         | 22 | 7.47E-03 |
| GOTERM_BP_FAT | GO:0000165~MAPKKK cascade                                       | 14 | 7.59E-03 |
| GOTERM_BP_FAT | GO:0060548~negative regulation of cell death                    | 22 | 7.76E-03 |
| GOTERM_BP_FAT | GO:0010629~negative regulation of gene expression               | 28 | 8.35E-03 |
| GOTERM_BP_FAT | GO:0031344~regulation of cell projection organization           | 9  | 8.66E-03 |
| GOTERM_BP_FAT | GO:0016481~negative regulation of transcription                 | 26 | 9.04E-03 |
| GOTERM_BP_FAT | GO:0016477~cell migration                                       | 18 | 9.52E-03 |
| GOTERM_BP_FAT | GO:0051174~regulation of phosphorus metabolic process           | 27 | 9.72E-03 |
| GOTERM_BP_FAT | GO:0019220~regulation of phosphate metabolic process            | 27 | 9.72E-03 |
| GOTERM_BP_FAT | GO:0051094~positive regulation of developmental process         | 18 | 1.02E-02 |
| GOTERM_BP_FAT | GO:0031327~negative regulation of cellular biosynthetic process | 30 | 1.02E-02 |
| GOTERM_BP_FAT | GO:0007409~axonogenesis                                         | 14 | 1.11E-02 |
| GOTERM_BP_FAT | GO:0001654~eye development                                      | 11 | 1.15E-02 |
| GOTERM_BP_FAT | GO:0001649~osteoblast differentiation                           | 6  | 1.16E-02 |
| GOTERM_BP_FAT | GO:0045596~negative regulation of cell                          | 15 | 1.18E-02 |

|               |                                                                      |    |          |
|---------------|----------------------------------------------------------------------|----|----------|
|               | differentiation                                                      |    |          |
| GOTERM_BP_FAT | GO:0048562~embryonic organ morphogenesis                             | 11 | 1.21E-02 |
| GOTERM_BP_FAT | GO:0019058~viral infectious cycle                                    | 6  | 1.27E-02 |
| GOTERM_BP_FAT | GO:0048706~embryonic skeletal system development                     | 8  | 1.29E-02 |
| GOTERM_BP_FAT | GO:0010558~negative regulation of macromolecule biosynthetic process | 29 | 1.32E-02 |
| GOTERM_BP_FAT | GO:0030029~actin filament-based process                              | 16 | 1.32E-02 |
| GOTERM_BP_FAT | GO:0006928~cell motion                                               | 26 | 1.34E-02 |
| GOTERM_BP_FAT | GO:0001890~placenta development                                      | 7  | 1.34E-02 |
| GOTERM_BP_FAT | GO:0009890~negative regulation of biosynthetic process               | 30 | 1.35E-02 |
| GOTERM_BP_FAT | GO:0045892~negative regulation of transcription, DNA-dependent       | 21 | 1.35E-02 |
| GOTERM_BP_FAT | GO:0009991~response to extracellular stimulus                        | 15 | 1.36E-02 |
| GOTERM_BP_FAT | GO:0043549~regulation of kinase activity                             | 21 | 1.39E-02 |
| GOTERM_BP_FAT | GO:0050804~regulation of synaptic transmission                       | 11 | 1.39E-02 |
| GOTERM_BP_FAT | GO:0046649~lymphocyte activation                                     | 14 | 1.40E-02 |
| GOTERM_BP_FAT | GO:0042981~regulation of apoptosis                                   | 39 | 1.46E-02 |
| GOTERM_BP_FAT | GO:0051253~negative regulation of RNA metabolic process              | 21 | 1.60E-02 |
| GOTERM_BP_FAT | GO:0010605~negative regulation of macromolecule metabolic process    | 36 | 1.62E-02 |
| GOTERM_BP_FAT | GO:0043067~regulation of programmed cell death                       | 39 | 1.67E-02 |
| GOTERM_BP_FAT | GO:0010243~response to organic nitrogen                              | 7  | 1.68E-02 |
| GOTERM_BP_FAT | GO:0030036~actin cytoskeleton organization                           | 15 | 1.68E-02 |
| GOTERM_BP_FAT | GO:0050850~positive regulation of calcium-mediated signaling         | 4  | 1.69E-02 |
| GOTERM_BP_FAT | GO:0048547~gut morphogenesis                                         | 4  | 1.69E-02 |
| GOTERM_BP_FAT | GO:0042177~negative regulation of protein catabolic process          | 4  | 1.69E-02 |
| GOTERM_BP_FAT | GO:0010941~regulation of cell death                                  | 39 | 1.76E-02 |
| GOTERM_BP_FAT | GO:0045597~positive regulation of cell differentiation               | 15 | 1.87E-02 |
| GOTERM_BP_FAT | GO:0045859~regulation of protein kinase activity                     | 20 | 1.91E-02 |
| GOTERM_BP_FAT | GO:0042325~regulation of phosphorylation                             | 25 | 1.93E-02 |
| GOTERM_BP_FAT | GO:0030217~T cell differentiation                                    | 7  | 1.93E-02 |
| GOTERM_BP_FAT | GO:0048754~branching morphogenesis of a tube                         | 7  | 1.93E-02 |
| GOTERM_BP_FAT | GO:0042491~auditory receptor cell differentiation                    | 4  | 1.97E-02 |
| GOTERM_BP_FAT | GO:0060117~auditory receptor cell development                        | 3  | 2.01E-02 |

|               |                                                                                                         |    |          |
|---------------|---------------------------------------------------------------------------------------------------------|----|----------|
| GOTERM_BP_FAT | GO:0051172~negative regulation of nitrogen compound metabolic process                                   | 27 | 2.06E-02 |
| GOTERM_BP_FAT | GO:0051338~regulation of transferase activity                                                           | 21 | 2.07E-02 |
| GOTERM_BP_FAT | GO:0048514~blood vessel morphogenesis                                                                   | 14 | 2.17E-02 |
| GOTERM_BP_FAT | GO:0051969~regulation of transmission of nerve impulse                                                  | 11 | 2.28E-02 |
| GOTERM_BP_FAT | GO:0045058~T cell selection                                                                             | 4  | 2.29E-02 |
| GOTERM_BP_FAT | GO:0051325~interphase                                                                                   | 9  | 2.30E-02 |
| GOTERM_BP_FAT | GO:0007264~small GTPase mediated signal transduction                                                    | 18 | 2.32E-02 |
| GOTERM_BP_FAT | GO:0030097~hemopoiesis                                                                                  | 15 | 2.33E-02 |
| GOTERM_BP_FAT | GO:0035239~tube morphogenesis                                                                           | 10 | 2.37E-02 |
| GOTERM_BP_FAT | GO:0051960~regulation of nervous system development                                                     | 13 | 2.43E-02 |
| GOTERM_BP_FAT | GO:0048870~cell motility                                                                                | 18 | 2.46E-02 |
| GOTERM_BP_FAT | GO:0051674~localization of cell                                                                         | 18 | 2.46E-02 |
| GOTERM_BP_FAT | GO:0050848~regulation of calcium-mediated signaling                                                     | 4  | 2.63E-02 |
| GOTERM_BP_FAT | GO:0045737~positive regulation of cyclin-dependent protein kinase activity                              | 3  | 2.63E-02 |
| GOTERM_BP_FAT | GO:0031670~cellular response to nutrient                                                                | 3  | 2.63E-02 |
| GOTERM_BP_FAT | GO:0031016~pancreas development                                                                         | 5  | 2.67E-02 |
| GOTERM_BP_FAT | GO:0010975~regulation of neuron projection development                                                  | 7  | 2.68E-02 |
| GOTERM_BP_FAT | GO:0031644~regulation of neurological system process                                                    | 11 | 2.90E-02 |
| GOTERM_BP_FAT | GO:0007585~respiratory gaseous exchange                                                                 | 5  | 2.92E-02 |
| GOTERM_BP_FAT | GO:0001776~leukocyte homeostasis                                                                        | 5  | 2.92E-02 |
| GOTERM_BP_FAT | GO:0045884~regulation of survival gene product expression                                               | 4  | 2.99E-02 |
| GOTERM_BP_FAT | GO:0001701~in utero embryonic development                                                               | 12 | 3.02E-02 |
| GOTERM_BP_FAT | GO:0045934~negative regulation of nucleobase, nucleoside, nucleotide and nucleic acid metabolic process | 26 | 3.05E-02 |
| GOTERM_BP_FAT | GO:0045664~regulation of neuron differentiation                                                         | 10 | 3.07E-02 |
| GOTERM_BP_FAT | GO:0000079~regulation of cyclin-dependent protein kinase activity                                       | 6  | 3.13E-02 |
| GOTERM_BP_FAT | GO:0009314~response to radiation                                                                        | 13 | 3.20E-02 |
| GOTERM_BP_FAT | GO:0042135~neurotransmitter catabolic process                                                           | 3  | 3.31E-02 |
| GOTERM_BP_FAT | GO:0060119~inner ear receptor cell development                                                          | 3  | 3.31E-02 |
| GOTERM_BP_FAT | GO:0048732~gland development                                                                            | 10 | 3.34E-02 |
| GOTERM_BP_FAT | GO:0009628~response to abiotic stimulus                                                                 | 20 | 3.38E-02 |
| GOTERM_BP_FAT | GO:0019059~initiation of viral infection                                                                | 4  | 3.38E-02 |

|               |                                                                                          |    |          |
|---------------|------------------------------------------------------------------------------------------|----|----------|
| GOTERM_BP_FAT | GO:0001763~morphogenesis of a branching structure                                        | 7  | 3.40E-02 |
| GOTERM_BP_FAT | GO:0045767~regulation of anti-apoptosis                                                  | 5  | 3.48E-02 |
| GOTERM_BP_FAT | GO:0000082~G1/S transition of mitotic cell cycle                                         | 6  | 3.59E-02 |
| GOTERM_BP_FAT | GO:0009416~response to light stimulus                                                    | 10 | 3.76E-02 |
| GOTERM_BP_FAT | GO:0048567~ectodermal gut morphogenesis                                                  | 3  | 4.05E-02 |
| GOTERM_BP_FAT | GO:0048708~astrocyte differentiation                                                     | 3  | 4.05E-02 |
| GOTERM_BP_FAT | GO:0007439~ectodermal gut development                                                    | 3  | 4.05E-02 |
| GOTERM_BP_FAT | GO:0046486~glycerolipid metabolic process                                                | 11 | 4.05E-02 |
| GOTERM_BP_FAT | GO:0033674~positive regulation of kinase activity                                        | 14 | 4.06E-02 |
| GOTERM_BP_FAT | GO:0006892~post-Golgi vesicle-mediated transport                                         | 6  | 4.08E-02 |
| GOTERM_BP_FAT | GO:0010647~positive regulation of cell communication                                     | 18 | 4.31E-02 |
| GOTERM_BP_FAT | GO:0010553~negative regulation of specific transcription from RNA polymerase II promoter | 5  | 4.43E-02 |
| GOTERM_BP_FAT | GO:0048839~inner ear development                                                         | 7  | 4.47E-02 |
| GOTERM_BP_FAT | GO:0050767~regulation of neurogenesis                                                    | 11 | 4.65E-02 |
| GOTERM_BP_FAT | GO:0002694~regulation of leukocyte activation                                            | 11 | 4.65E-02 |
| GOTERM_BP_FAT | GO:0048534~hemopoietic or lymphoid organ development                                     | 15 | 4.73E-02 |
| GOTERM_BP_FAT | GO:0022404~molting cycle process                                                         | 5  | 4.77E-02 |
| GOTERM_BP_FAT | GO:0001942~hair follicle development                                                     | 5  | 4.77E-02 |
| GOTERM_BP_FAT | GO:0048663~neuron fate commitment                                                        | 5  | 4.77E-02 |
| GOTERM_BP_FAT | GO:0022405~hair cycle process                                                            | 5  | 4.77E-02 |
| GOTERM_BP_FAT | GO:0046902~regulation of mitochondrial membrane permeability                             | 3  | 4.84E-02 |
| GOTERM_BP_FAT | GO:0043586~tongue development                                                            | 3  | 4.84E-02 |
| GOTERM_MF_FAT | GO:0030528~transcription regulator activity                                              | 83 | 1.88E-06 |
| GOTERM_MF_FAT | GO:0016563~transcription activator activity                                              | 33 | 4.43E-06 |
| GOTERM_MF_FAT | GO:0003700~transcription factor activity                                                 | 52 | 5.01E-04 |
| GOTERM_MF_FAT | GO:0019899~enzyme binding                                                                | 32 | 9.62E-04 |
| GOTERM_MF_FAT | GO:0043565~sequence-specific DNA binding                                                 | 35 | 1.48E-03 |
| GOTERM_MF_FAT | GO:0008134~transcription factor binding                                                  | 30 | 2.80E-03 |
| GOTERM_MF_FAT | GO:0003713~transcription coactivator activity                                            | 16 | 4.41E-03 |
| GOTERM_MF_FAT | GO:0043236~laminin binding                                                               | 4  | 4.66E-03 |
| GOTERM_MF_FAT | GO:0003779~actin binding                                                                 | 20 | 1.05E-02 |
| GOTERM_MF_FAT | GO:0050840~extracellular matrix binding                                                  | 5  | 1.08E-02 |
| GOTERM_MF_FAT | GO:0003677~DNA binding                                                                   | 95 | 1.35E-02 |
| GOTERM_MF_FAT | GO:0003702~RNA polymerase II transcription factor activity                               | 16 | 1.40E-02 |

|               |                                                                              |     |          |
|---------------|------------------------------------------------------------------------------|-----|----------|
| GOTERM_MF_FAT | GO:0003712~transcription cofactor activity                                   | 21  | 1.57E-02 |
| GOTERM_MF_FAT | GO:0046983~protein dimerization activity                                     | 28  | 1.88E-02 |
| GOTERM_MF_FAT | GO:0051427~hormone receptor binding                                          | 8   | 2.46E-02 |
| GOTERM_MF_FAT | GO:0043121~neurotrophin binding                                              | 3   | 2.60E-02 |
| GOTERM_MF_FAT | GO:0008047~enzyme activator activity                                         | 19  | 2.61E-02 |
| GOTERM_MF_FAT | GO:0060589~nucleoside-triphosphatase regulator activity                      | 22  | 2.96E-02 |
| GOTERM_MF_FAT | GO:0016564~transcription repressor activity                                  | 18  | 3.01E-02 |
| GOTERM_MF_FAT | GO:0005083~small GTPase regulator activity                                   | 16  | 3.51E-02 |
| GOTERM_MF_FAT | GO:0003705~RNA polymerase II transcription factor activity, enhancer binding | 5   | 3.72E-02 |
| GOTERM_MF_FAT | GO:0010843~promoter binding                                                  | 6   | 3.76E-02 |
| GOTERM_MF_FAT | GO:0035257~nuclear hormone receptor binding                                  | 7   | 3.94E-02 |
| GOTERM_MF_FAT | GO:0005095~GTPase inhibitor activity                                         | 3   | 4.01E-02 |
| GOTERM_MF_FAT | GO:0030695~GTPase regulator activity                                         | 21  | 4.21E-02 |
| GOTERM_CC_FAT | GO:0044459~plasma membrane part                                              | 102 | 1.83E-05 |
| GOTERM_CC_FAT | GO:0009986~cell surface                                                      | 25  | 2.26E-04 |
| GOTERM_CC_FAT | GO:0045202~synapse                                                           | 24  | 7.22E-04 |
| GOTERM_CC_FAT | GO:0009898~internal side of plasma membrane                                  | 21  | 2.10E-03 |
| GOTERM_CC_FAT | GO:0009897~external side of plasma membrane                                  | 14  | 2.50E-03 |
| GOTERM_CC_FAT | GO:0000267~cell fraction                                                     | 51  | 2.88E-03 |
| GOTERM_CC_FAT | GO:0005886~plasma membrane                                                   | 142 | 5.31E-03 |
| GOTERM_CC_FAT | GO:0005794~Golgi apparatus                                                   | 41  | 8.40E-03 |
| GOTERM_CC_FAT | GO:0005605~basal lamina                                                      | 4   | 1.46E-02 |
| GOTERM_CC_FAT | GO:0019717~synaptosome                                                       | 8   | 1.64E-02 |
| GOTERM_CC_FAT | GO:0019897~extrinsic to plasma membrane                                      | 6   | 1.90E-02 |
| GOTERM_CC_FAT | GO:0030054~cell junction                                                     | 26  | 1.95E-02 |
| GOTERM_CC_FAT | GO:0005626~insoluble fraction                                                | 38  | 1.98E-02 |
| GOTERM_CC_FAT | GO:0043005~neuron projection                                                 | 19  | 2.09E-02 |
| GOTERM_CC_FAT | GO:0034703~cation channel complex                                            | 10  | 2.19E-02 |
| GOTERM_CC_FAT | GO:0030136~clathrin-coated vesicle                                           | 10  | 2.19E-02 |
| GOTERM_CC_FAT | GO:0030055~cell-substrate junction                                           | 9   | 2.33E-02 |
| GOTERM_CC_FAT | GO:0030665~clathrin coated vesicle membrane                                  | 6   | 2.39E-02 |
| GOTERM_CC_FAT | GO:0016323~basolateral plasma membrane                                       | 13  | 2.49E-02 |
| GOTERM_CC_FAT | GO:0030135~coated vesicle                                                    | 11  | 2.66E-02 |
| GOTERM_CC_FAT | GO:0005624~membrane fraction                                                 | 36  | 2.91E-02 |
| GOTERM_CC_FAT | GO:0005783~endoplasmic reticulum                                             | 41  | 3.44E-02 |
| GOTERM_CC_FAT | GO:0000792~heterochromatin                                                   | 5   | 3.76E-02 |
| GOTERM_CC_FAT | GO:0031224~intrinsic to membrane                                             | 189 | 3.91E-02 |
| GOTERM_CC_FAT | GO:0005925~focal adhesion                                                    | 8   | 3.94E-02 |
| GOTERM_CC_FAT | GO:0031012~extracellular matrix                                              | 18  | 4.16E-02 |
| GOTERM_CC_FAT | GO:0015629~actin cytoskeleton                                                | 15  | 4.18E-02 |
| GOTERM_CC_FAT | GO:0042995~cell projection                                                   | 31  | 4.37E-02 |

|               |                                                               |   |          |
|---------------|---------------------------------------------------------------|---|----------|
| GOTERM_CC_FAT | GO:0000307~cyclin-dependent protein kinase holoenzyme complex | 3 | 4.40E-02 |
| GOTERM_CC_FAT | GO:0005905~coated pit                                         | 5 | 4.69E-02 |
| GOTERM_CC_FAT | GO:0005924~cell-substrate adherens junction                   | 8 | 4.69E-02 |

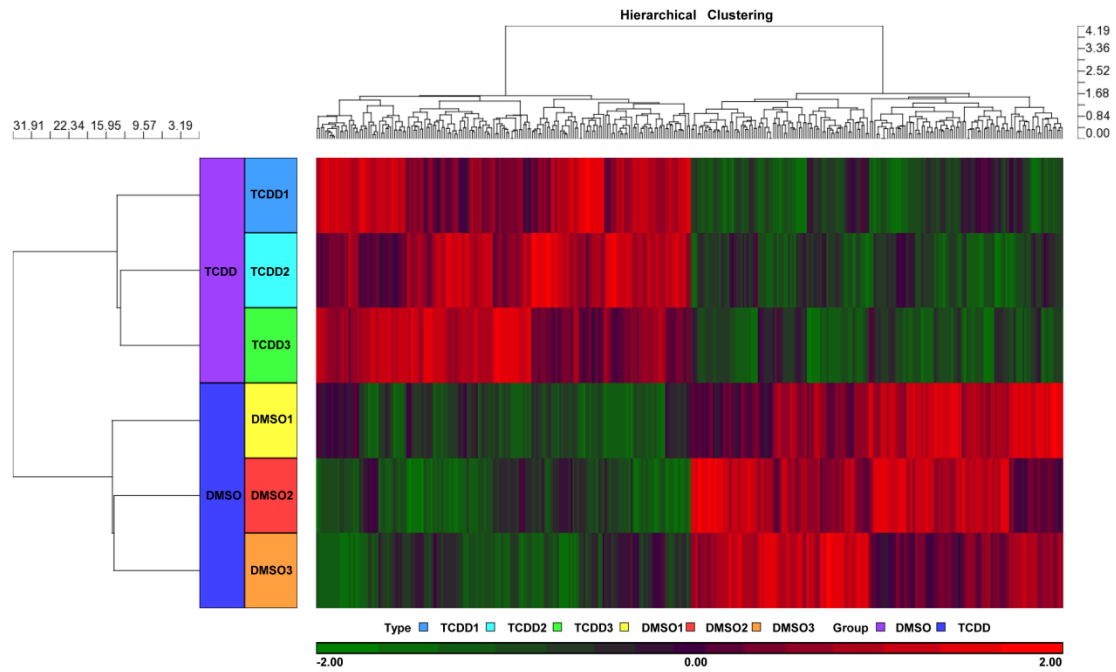

Supplementary figure 1. Differentially expressed miRNAs in response to dioxin in SK-N-SH cells. Cells were exposed to  $10^{-10}$  M TCDD or 0.1% DMSO for 24 hr. The clustered heat map shows discrimination of all three replicates of TCDD (at  $10^{-10}$  M) and DMSO treated groups. A dendrogram of the cluster analysis of miRNAs is shown.

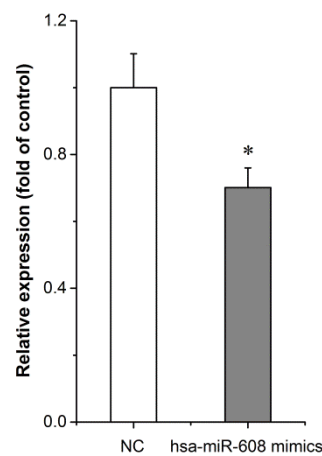

Supplementary figure 2. Hsa-miR-608 suppresses the expression of CDC42. SK-N-SH cells were transfected with hsa-miR-608 mimics or negative control (NC) for 24 hr. Total RNA was extracted for determination of the expression level of CDC42 mRNA. Quantitative PCR analyses were performed as mentioned in M & M. 18s ribosomal RNA was used as an internal control. Statistical analysis was done by t-test, and  $*p < 0.05$  compared with negative control (NC) group. All values were expressed as mean  $\pm$  S.E. (n=3) and each independent sample was detected in triplicate wells.
